# Supplementary material
Source: PubMed Central journal article supplement (PMC7214275)
Supplement: 41375_2019_493_MOESM1_ESM.pdf [file 41375_2019_493_MOESM1_ESM.pdf]

1 **SUPPLEMENTARY METHODS**

2 **Cell culture**

3 MM.1S and H929 MM cell lines expressing luciferase and RFP (MM1S.Luc and H929.Luc) were  
4 kindly gifted by Dr Xue Li (Harbin Institute of Technology, Harbin, China). The bone marrow  
5 stromal cell line (BMSC) HS-5 was purchased from the American Type Culture Collection (ATCC).  
6 The MM-derived stromal cell line MSP-1 was kindly gifted by Dr Abdel Kareem Azab (Washington  
7 University in Saint Louis School of Medicine, USA). HS-5 and MSP-1 were maintained in  
8 Dulbecco's Modified Eagle's Medium (DMEM) containing 100 U ml<sup>-1</sup> penicillin and 100 ug/ml  
9 streptomycin, supplemented with 10% (v/v) fetal bovine serum. The human bone marrow  
10 endothelial cell line, BMEC-60, was kindly provided by Dr CE van der Schoot (CLB, Amsterdam,  
11 The Netherlands), and was cultured in endothelial culture medium (EGM-2, Lonza) with full  
12 supplements (EGM-2 bullet kit: 2% FBS, 0.4% hFGF-2, 0.1% VEGF, 0.1% R<sup>3</sup>-IGF-1, 0.1% hEGF,  
13 0.04% hydrocortisone, 0.1% ascorbic acid, 0.1% heparin, and 0.1%-GA-100). All MM cell lines  
14 were maintained in Roswell Park Memorial Institute (RPMI)-1640 medium containing 2.5 mg ml  
15 <sup>-1</sup> plasmocin, 100 U ml<sup>-1</sup> penicillin and 100 ug ml<sup>-1</sup> streptomycin, supplemented with 10% (v/v)  
16 fetal bovine serum and 2 µg L-glutamine, in 5% CO<sub>2</sub> at 37°C. Cell lines were intermittently tested  
17 to rule out mycoplasma contamination using the MycoAlert Mycoplasma Detection Kit (Lonza),  
18 and MM cell lines were authenticated via short tandem repeat (STR) profiling.

19

20 **Primary bone marrow stromal cells (BMSCs)**

21 Bone marrow samples were obtained from patients diagnosed with MM, after obtaining  
22 informed consent and approval by the Institutional Review Board of the Dana-Farber Cancer

23 Institute. Bone marrow mononuclear cells (BMMC) were separated by Ficoll-Paque PLUS (GE  
24 Healthcare), and MM cells were enriched by CD138-positive selection with anti-CD138 magnetic  
25 activated cell separation microbeads (Miltenyi Biotec). Long-term bone marrow stromal cell  
26 culture was established by culturing CD138-negative bone marrow mononuclear cells for 4-6  
27 weeks in RPMI containing 100 U ml<sup>-1</sup> penicillin and 100 ug ml<sup>-1</sup> streptomycin, supplemented with  
28 20% (v/v) fetal bovine serum (FBS).

29

### 30 **Autologous co-culture of primary CD138<sup>+</sup> MM cells and HDAC3-silenced CD138<sup>-</sup> BMMCs derived** 31 **from patients with MM**

32 BMMCs were first isolated from bone marrow aspirates using Ficoll-Paque PLUS (GE Healthcare).  
33 MM cells were then magnetically separated through CD138-positive selection. The CD138<sup>-</sup>  
34 fraction was then stained with CellTrace™ Violet (Thermo Fisher) according to the manufacturer's  
35 protocol. Following staining, the NEON transfection system (Thermo Fisher) was used to transfect  
36 CD138<sup>-</sup> BMMCs with HDAC3 siRNA. Briefly, 75nM of siRNA was used for each transfection. The  
37 following electroporation parameters were used. Pulse voltage: 2150V, pulse width: 20ms, pulse  
38 number: 1, cell density 2 x 10<sup>7</sup> cells ml<sup>-1</sup>. CD138<sup>+</sup> and transfected CD138<sup>-</sup> BMMM were cultured  
39 separately overnight. The following day, CD138<sup>-</sup> BMMC were washed once with PBS and co-  
40 cultured with autologous CD138<sup>+</sup> MM cells for up to 7 days. Cells were then collected and stained  
41 with Annexin V and PI before analysis by flow cytometry. CD138<sup>+</sup> (cell-trace violet negative) and  
42 CD138<sup>-</sup> (cell-trace violet positive) cells were subsequently discriminated by gating according to  
43 expression of cell trace violet (Y axes).

44



#### 45 **Lentiviral transduction of HDAC3 shRNA**

46 Viral production and infection were carried out as previously described<sup>9</sup>. In competent lentivirus  
47 was produced by transiently transfecting host 293T cells with pLKO.1 plasmid expressing HDAC3  
48 shRNA or scrambled sequence, psPAX2, and pMD2.G in a 4:1:1 ratio using Lipofectamine 2000  
49 Transfection Reagent (Invitrogen, CA, USA), according to the manufacturer's instructions. MM  
50 cells were incubated in lentivirus containing media in the presence of 8µg/ml of polybrene  
51 (Sigma-Aldrich) for 48H. After 48H of viral infection, cells expressing shRNAs were selected with  
52 puromycin dihydrochloride (Sigma-Aldrich) at 0.5µg/mL. The following shRNAs (Dharmacon™, GE  
53 Healthcare Life Sciences) against CD130 were used: #1 TRCN0000058283  
54 (GCCACATAATTTATCAGTGAT), #2 TRCN0000058284 (CCAGTCCAGATATTTACATT), #3  
55 TRCN0000058285 (CCCATACTCAAGGCTACAGAA).

56

#### 57 **Endothelial tube formation assay (In-vitro angiogenesis assay kit; Abcam)**

58 The bone marrow endothelial cell line (BMEC60) was transfected with HDAC3 siRNA for 48H to  
59 silence HDAC3. Cells were then harvested, washed, and re-suspended in endothelial cell media  
60 (Lonza). 50ul of thawed extracellular matrix solution (EMS) was then added to each well of a pre-  
61 chilled (on ice) 96-well plate sterile culture plate. The plate was incubated for 1H at 37°C to allow  
62 the solution to form a gel.  $2 \times 10^4$  cells/well was added onto the solidified extracellular matrix gel  
63 and incubated overnight. The incubation media was then carefully removed by aspiration,  
64 without disturbing the cells or the extracellular matrix gel. The wells were then gently washed  
65 with 100ul of wash buffer to remove serum. Staining dye was added, and cells were incubated

66 for 30mins at 37°C. Endothelial tube formation was examined using light and fluorescence  
67 microscopy.

68

#### 69 **Flow cytometry apoptosis assay**

70 Cells were harvested following RNAi/drug treatment and washed twice with PBS before being  
71 pelleted by centrifugation at 1200 rpm. The cell pellet was re-suspended in PBS containing 1X  
72 Annexin V binding buffer with 1 mg/ml of Annexin V antibody (BD Biosciences). Cells were stained  
73 with Annexin V for 20 mins on ice. Prior to acquisition, 1mg/ml of propidium iodide (or DAPI) was  
74 added, and cells were acquired using a flow cytometer (BD LSRFortessa™) and analyzed using  
75 FlowJo (TreeStar). Cells that were propidium iodide (PI) negative and Annexin V negative are  
76 considered alive; PI negative and Annexin V positive cells were considered early apoptotic;  
77 double positive cells were considered late apoptotic; and PI positive but annexin V negative cells  
78 were considered necrotic.

79

#### 80 **MM cell adhesion assay**

81 Bone marrow stromal cells (BMSCs) were plated at a density of  $1 \times 10^4$  per well in a 96-well plate  
82 1 day before the adhesion assay. Human fibronectin- or BSA-coated plates were purchased from  
83 R&D Systems. MM cells were pre-labeled by incubating in the presence of 1 mM calcein AM  
84 (Molecular Probes) at 37 °C for 30 min. After washing with PBS with calcium and magnesium (PBS  
85 (+)) twice, labeled cells were resuspended in PBS (+) at a concentration of  $1 \times 10^6$  ml<sup>-1</sup>.  
86 Subsequently,  $1 \times 10^5$  cells were then incubated in 96-well plates coated with bone marrow  
87 stromal cells (BMSCs), fibronectin or BSA at 37°C for 2H. After measuring the fluorescent intensity

88 of pre-wash samples, wells were washed two to three times with PBS. The fluorescent intensity  
89 of adherent cells was then quantified using a fluorescence plate reader (SpectraMax M3,  
90 Molecular Devices) at an excitation wavelength of 485 nm and an emission wavelength of 525  
91 nm. The percentage adhesion was determined by calculating the ratios of the fluorescent  
92 intensity of the post-wash sample to that of the pre-wash sample.

93

#### 94 **Transwell migration assay**

95 For migration studies, control or HDAC3 silenced HS-5 cells were plated on the lower chambers  
96 and cultured in serum-free RPMI 1640 overnight. The next day, control or 15ug/ml of anti-CXCL1  
97 neutralizing antibody (R&D systems) was added to the lower chamber before MM1S.Luc ( $5 \times 10^5$   
98 cells) suspended in serum-free RPMI 1640 media were placed in the upper chambers of the  
99 transwell plates (pore size  $8\mu\text{M}$ ; Costar-Corning). After 4H incubation at  $37^\circ\text{C}$ , MM1S.Luc cells  
100 that had migrated to the lower chambers were lysed, and the quantitative Luciferase assay was  
101 performed.

102

#### 103 **Protein array**

104 Analysis of the expression of cytokines in co-cultures of multiple myeloma cells and bone marrow  
105 stromal cells was carried out using the RayBio C1000 antibody array (Redwood City, USA). The  
106 membrane, which was spotted with various immobilized antibodies for cytokines and growth  
107 factors, was incubated in the presence of 2ml of conditioned media from co-cultures of  
108 MM1S.Luc and HS-5 cells. The membrane was then incubated with a mixture of biotin-conjugated  
109 anti-cytokine antibodies (dilution, 1:60). Antibodies bound to the array were detected using

110 streptavidin-horseradish peroxidase according to the manufacturer's instructions, and then  
111 developed with enhanced chemiluminescence.

112

### 113 **sgp130 assay**

114 ELISA detection of soluble gp130 was carried out using a murine anti-human gp130 antibody for  
115 capture and a polyclonal antibody against human gp130 conjugated with horseradish peroxidase  
116 for detection, according to the manufacturer's instructions (R&D Systems).

117

### 118 **Quantitative proteomic profiling by label-free liquid chromatography–MS/MS analysis**

119 Cell pellets were sonicated in 8 M urea/50 mM NH<sub>4</sub>HCO<sub>3</sub>/0.1% ProteaseMax using sonication,  
120 with resultant protein levels quantified using a Bradford assay. Following dithiothreitol (DTT)  
121 reduction and iodoacetic acid-mediated alkylation, a double digestion was performed using Lys-  
122 C (for 4H at 37 °C) and Trypsin (overnight at 37 °C) on 5 µg of protein. The samples were then  
123 desalted prior to analysis using C18 spin columns (Thermo Scientific), and 500ng was loaded onto  
124 an Ultimate 3000 NanoLC system (Dionex Corporation, Sunnyvale, CA, USA) coupled to a Q-  
125 Exactive mass spectrometer (Thermo Fisher Scientific). The raw data were analyzed using  
126 Progenesis QI for Proteomics software (version 3.1; Non-Linear Dynamics, a Waters Company,  
127 Newcastle upon Tyne, UK), as previously described, with following modifications: the filter mass  
128 peaks with charge states from +1 to+6 was applied to the MS/MS data files; peptides were  
129 identified using taxonomy: Homo sapiens in the SwissProt database, and peptides with XCorr  
130 scores 41.9 for +1 ions, 42.2 for +2 ions, and 43.75 for +3 ions or more (from Sequest HT) were  
131 selected. Three biological replicates were performed.

132 **Bioinformatic analysis**

133 For interpretation of MS/MS spectra, we performed STRING protein-protein interaction (string-  
134 db.org) with enrichment of Gene Ontology (GO) analysis of these data sets to predict biological  
135 processes, as well as interactive networks to identify signaling pathways for identified genes.

136

137 **Exosome isolation**

138 Cells were cultured for 48H in RPMI-1640 with 10% exosome-depleted FBS (Thermo Fisher). The  
139 supernatant was then harvested by centrifugation at 2,000 rpm, and filtered through a 0.2µM  
140 filter to remove cell debris. The exoEasy Maxi kit from Qiagen was then used to isolate exosomes,  
141 according to the manufacturer's protocol. A buffer exchange using size exclusion  
142 chromatography was performed to remove toxic buffer XE prior to co-culture with MM1S.Luc  
143 cells.

144

145 **Exosome RNA isolation**

146 Exosomes were first isolated from conditioned supernatant using the exoEasy Maxi kit (Qiagen).  
147 Instead of eluting the exosomes with buffer XE, 700ul of Qiazol was added to the membrane.  
148 3.5ul of miRNeasy Serum/Plasma Spike-In Control was added to each sample. 90ul of chloroform  
149 was added to the lysate and shaken vigorously for 15s. Following centrifugation, the upper  
150 aqueous phase was transferred to a new collection tube, and 2 volumes of 100% ethanol was  
151 added. Total RNA from the resultant sample was then isolated using the RNeasy MinElute spin  
152 column.

153

154 **Nanoparticle tracking analysis (NTA)**

155 EV samples were run using the standard measurement procedure at 25 °C with a constant syringe  
156 infusion rate of 50, per the NanoSight NTA 3.1 Software (Malvern). The data for each sample  
157 were obtained from 10 independent 60s video captures on the NS300, analyzed, and normalized  
158 to final cell counts for each condition.

159

160 **Small RNAseq**

161 Small RNAseq of total RNA from exosomes was performed using the Illumina HiSeq, 2x150bp  
162 configuration (Genewiz Next Generation Sequencing Services, South Plainfield, NJ). RNAs <200bp  
163 were then selected for further analysis by the Joslin Diabetes Center Bioinformatics core (Boston,  
164 MA).

165

166 **Confocal microscopy**

167 Exosome samples were stained according to the following protocol: 15ul of EV-containing PBS  
168 solution was pipetted onto 15ul of a 40uM CFSE solution, and incubated for 2H at 37°C. Tubes  
169 were mixed by flicking every hour. The 8 samples were then combined, and unbound CFSE was  
170 removed by size exclusion chromatography. CFSE-labeled exosomes were then cultured for 6h  
171 with MM1S.Luc-mCherry at 37°C and were washed twice with PBS. After washing, cells were  
172 cytocentrifuged onto glass slides at 800 rpm for 5min and allowed to air dry. Cells were then fixed  
173 with 1% paraformaldehyde at room temperature for 30min. After washing in PBS, cells were  
174 then permeabilized with 0.1% Triton X-100 for 3min, and washed with PBS. DNA was stained with  
175 1ug/ml of 4',6-diamidino-2-phenylindole (DAPI) for 5min and washed in PBS. Coverslips were

176 mounted using DakoCytomation fluorescent mounting medium. Stained cells were imaged using  
177 a Zeiss confocal microscope, and images were captured using the AxioVision Imaging software.

178

### 179 **Synthesis of methacrylated hyaluronic acid (HAMA)**

180 2-hydroxy-1-[4-(hydroxyethoxy)phenyl]-2-methyl-1-propanone (Irgacure 2959) was obtained  
181 from BASF Corporation (Florham Park, NJ). Microscope slides were supplied by VWR (Radnor,  
182 PA). Methacrylic anhydride and sodium hydroxide were obtained from Sigma-Aldrich (St. Louis,  
183 MO). Sodium hyaluronate was supplied by Lifecore Biomedical (Chaska, MN). All reagents were  
184 used as received without further purification. To synthesize methacrylated hyaluronic acid  
185 (HAMA), 1 g sodium hyaluronate was added to 100 mL of deionized water and completely  
186 dissolved. To this solution, 1 mL methacrylic anhydride was added at 4 °C under moderate stirring  
187 conditions at 150 rpm. The reaction was carried out for 24 h. The pH of the reaction mixture was  
188 maintained between 8 and 10 using 5 M sodium hydroxide throughout the reaction period. The  
189 resulting solution was dialyzed against deionized water for 3 days in 12-14 kDa molecular weight  
190 cut-off membrane at 4 °C. The solution was then frozen at -80°C, lyophilized using a freeze dryer,  
191 and stored at -80 °C until experimental use. The degree of methacrylation for HAMA was  
192 determined to be 16% through proton nuclear magnetic resonance (NMR) analysis.

193

### 194 **Cell encapsulation in methacrylated hyaluronic acid (HAMA) hydrogels in three dimensions** 195 **(3D)**

196 The prepolymer solution for three-dimensional (3D) cell encapsulation was prepared by  
197 dissolving 2% (w/v) HAMA and 0.5% (w/v) photoinitiator (Irgacure 2959) in DPBS at 70 °C. The

198 prepolymer solution was then kept in 37°C incubator until the cell encapsulation process. The  
199 MM1S cells were cultured in RPMI 1640 medium supplemented with 10% (v/v) FBS, 1X  
200 GlutaMAX, and 1% (v/v) penicillin/streptomycin. The HS-5 cells were cultured in low glucose  
201 DMEM medium supplemented with 10% (v/v) FBS, 1X GlutaMAX, and 1% (v/v)  
202 penicillin/streptomycin. These cells were cultured in a humidified incubator at 37°C with 5% CO<sub>2</sub>  
203 supplementation. The HS-5 wild type (WT) and HS-5 knockout (KO) cells were trypsinized and  
204 centrifuged at 1500 rpm to obtain cell pellet. The MM1S.Luc cells were collected using a cell  
205 scraper and then centrifuged. Three different conditions for 3D cell encapsulation was  
206 performed: MM1S.Luc only; MM1S:HS-5 (WT) co-culture at 1:1 cell ratio; and MM1S:HS-5 (KO)  
207 co-culture at 1:1 cell ratio. All cells were counted and resuspended in the prepolymer solution at  
208 5 million cells per mL cell density for all three conditions. Ten microliters of the prepolymer  
209 solution with cells was next placed on a petri dish that included 150 µm spacer, and covered with  
210 a glass slide. The sample was exposed to UV light at 2.5 mW/cm<sup>2</sup> power for 4s to photo-crosslink  
211 the cell-laden prepolymer solution. The resulting hydrogel was then removed from the petri dish,  
212 rinsed in DPBS to remove the unreacted polymer, and subsequently cultured in a 24-well plate  
213 for up to 4 days. Three to four replicates were performed for each condition.

214

#### 215 **Measuring 3D *in vitro* MM1S.Luc proliferation using mCherry fluorescence**

216 3D cell encapsulation in 2% methacrylated hyaluronic acid (2% HAMA) was performed for three  
217 different conditions: MM1S.Luc alone, MM1S.Luc:HS-5 (WT) co-culture, and MM1S.Luc:HS-5  
218 (KO) co-culture. The resultant hydrogel was then subsequently cultured in a 24-well plates for up  
219 to 4 days. MM1S.Luc proliferation was then measured at day 0 and day 4 by reading mCherry



220 fluorescence (Ex: 587/Em: 610) using a spectrophotometer. Readings at day 4 were normalized  
221 to readings at day 0. MM1S.Luc proliferation was assessed by reading mCherry fluorescence (Ex:  
222 587/Em: 610) using a spectrophotometer on days 0 and 4, according to the manufacturer's  
223 protocol. Four replicates were used for each condition.

224

## 225 **Immunoblotting**

226 Cells were harvested and lysed using sodium dodecyl sulfate-polyacrylamide gel electrophoresis  
227 (SDS-PAGE) sample buffer containing 60 mM Tris-HCl, pH 6.8, 2% SDS, 10% glycerol, 0.005%  
228 bromophenol blue, 5 mM ethylenediaminetetraacetic acid, 5 mM NaF, 2 mM Na<sub>3</sub>VO<sub>4</sub>, 1 mM  
229 phenylmethylsulfonyl fluoride (PMSF), 5 µg/mL leupeptin, and 5 µg/mL aprotinin; and then  
230 heated at 100 °C for 5 min. After the determination of protein concentration using DC protein  
231 assay (Bio-Rad, Hercules, CA), β-mercaptoethanol (β-ME) was added to the whole-cell lysates to  
232 a 2% final β-ME concentration. The whole-cell lysates were subjected to SDS-PAGE, transferred  
233 to nitrocellulose membranes (Bio-Rad, Hercules, CA) or polyvinylidene fluoride membranes  
234 (Millipore, Billerica, MA), and immunoblotted -HDAC1 (#34589S), -HDAC2 (#57156S), -HDAC3  
235 (#3949S), -Acetyl-histone H3 (lysine 9) (Ac-H3K9) (#9649S), -glyceraldehyde-3-phosphate  
236 dehydrogenase (GAPDH) (#2118S), -Signal transducers and activators of transcription 3 (STAT3)  
237 (#30835S), -phospho-STAT3 (pSTAT3) (tyrosine 705) (#9131S), -Akt (#9272S), -phospho-Akt  
238 (serine 473) (#9271S), -p21 (#2947S), -Rb (#9309S), -phospho-Rb (serine 807/811) (#8516S), -  
239 GP130 (#3732S) (Abs; Cell Signaling Technology, Beverly, MA).

240 **SUPPLEMENTARY TABLE LEGEND**

241 **Table S1: Results of mass spectrometric analysis of proteins in HDAC3-silenced vs control HS-5**  
242 **cultured alone or together with MM cells**

243 Mass spectrometric analysis was performed on cell lysates obtained from HDAC3-silenced vs  
244 control HS-5 cultured alone or together with MM cells. In the HS-5 and MM co-culture group,  
245 CD138 positive selection was performed to separate the HS-5 cells from the MM cells before each  
246 compartment was sent for proteomic sequencing.

Figure S1

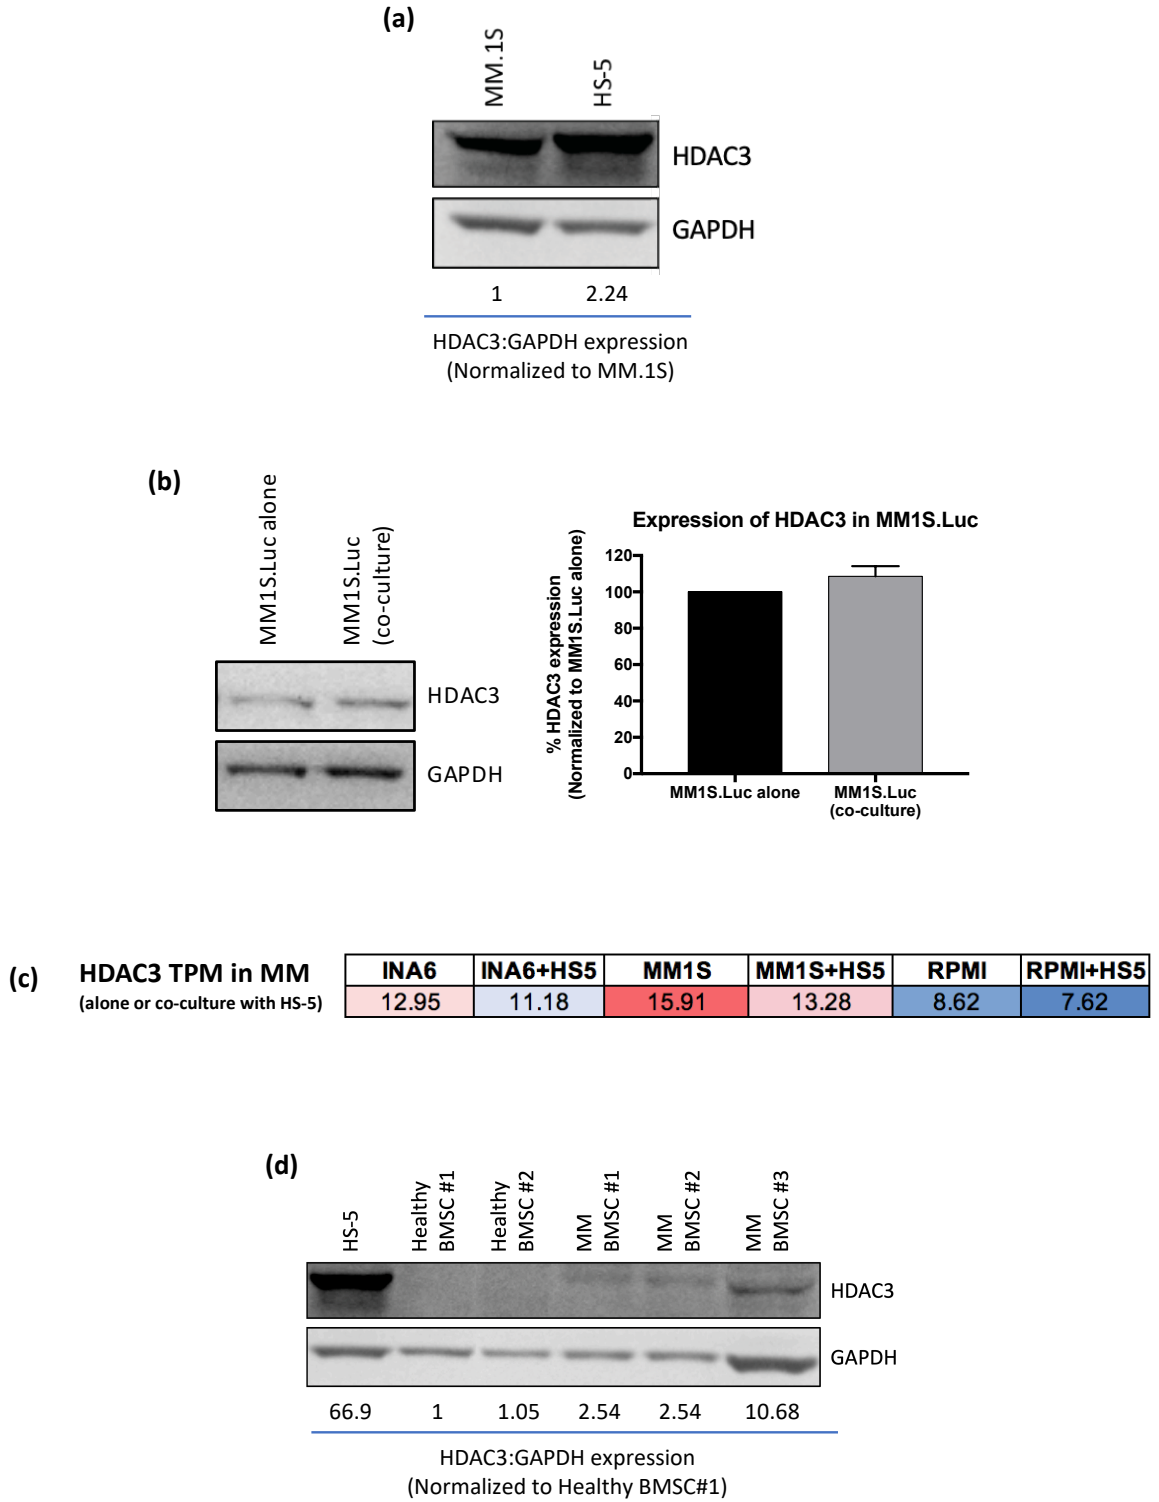

249 **Figure S1: HDAC3 expression in MM cells is not upregulated by co-culture with BMSCs**

250 **(a)** Western blot showing relative expression of HDAC3 in MM.1S MM cell line vs HS-5 stromal  
251 cell line. Notably, HDAC3 is more highly expressed in HS-5 compared to MM.1S as quantified  
252 using ImageJ. **(b)** HDAC3 expression in MM1S.Luc is not significantly altered when MM1S.Luc is  
253 co-cultured with HS-5. **(c)** Gene expression analysis from the IFM/DFCI dataset showing the  
254 relative expression of HDAC3 a panel of MM cell lines cultured alone or together with HS-5. **(d)**  
255 Western blot showing increased HDAC3 expression in primary MM-BMSC (N=3) versus HD-BMSC  
256 (N=2). Protein lysate from HS-5 was used as positive control. GAPDH served as loading control.  
257 Quantification was performed using ImageJ.

Figure S2

(a) **MM1S Proliferation Assay (Day 2)**

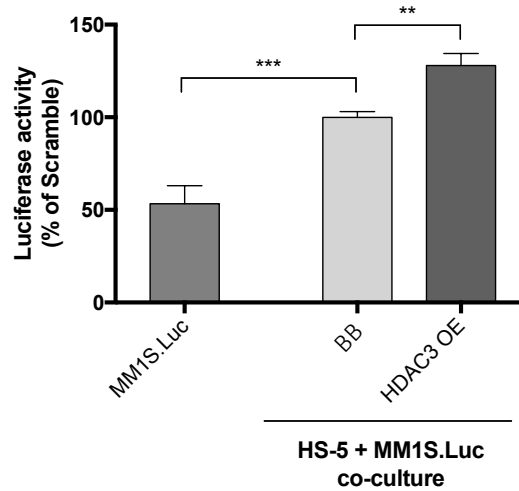

(b)

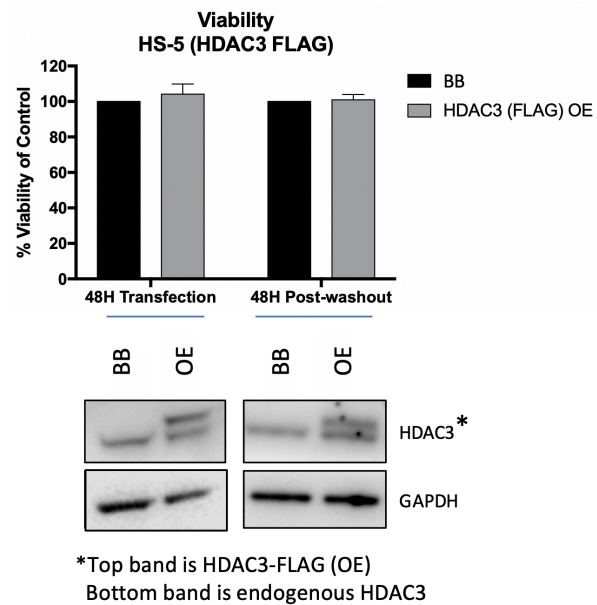

258

259 **Figure S2: HDAC3 overexpression in HS-5 significantly increased MM cell growth in co-culture**

260 **(a) and (b)** HDAC3 overexpression in HS-5 significantly increased MM cell growth in co-culture

261 (27.9% increase in MM proliferation in HDAC3 OE,  $p < 0.05$ ) without affecting HS-5 viability. **(b)**

262 Western blot showing successful overexpression of HDAC3-FLAG at indicated times.

**Figure S3**

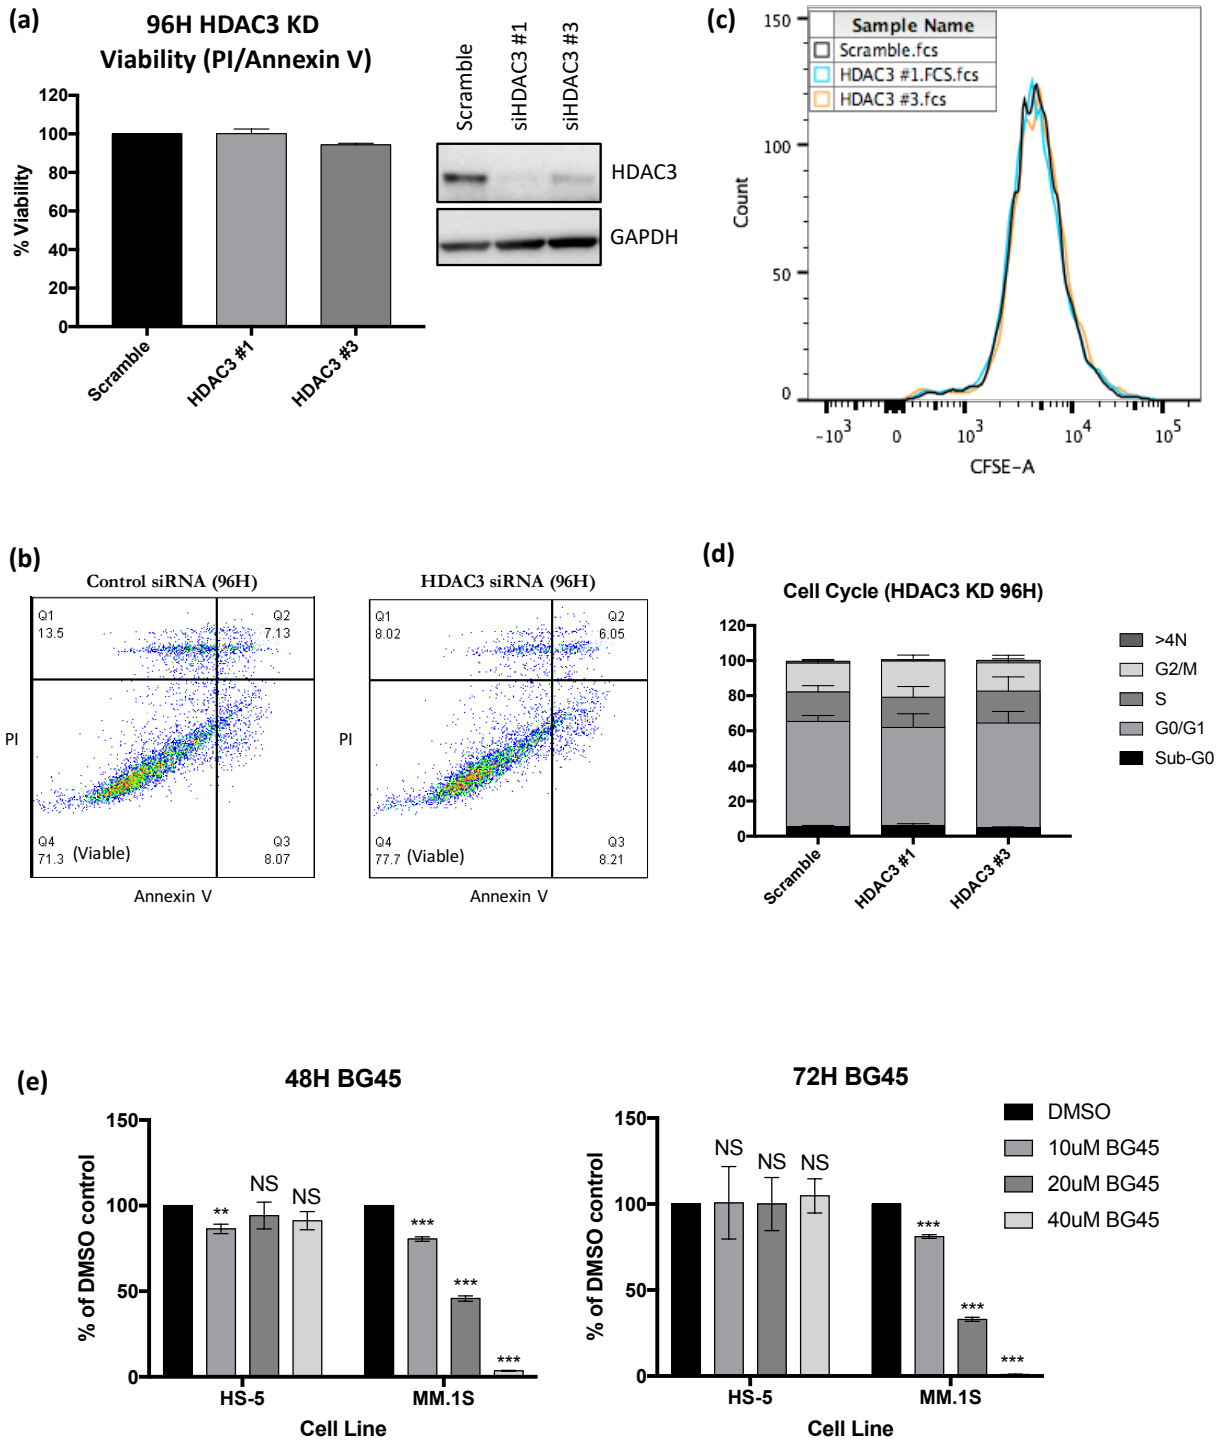

264 **Figure S3: HDAC3 expression is not necessary for BMSC viability or proliferation.**  
265 **(a)** HDAC3 knockdown does not have a significant impact on HS-5 viability. **(b)** HDAC3 silencing  
266 in primary BMSC derived from RRMM is not cytotoxic. **(c)** and **(d)** HDAC3 knockdown does not  
267 impact HS-5 proliferation as measured using CFSE dilution assay and propidium iodide cell cycle  
268 analysis, respectively. **(e)** HDAC3 inhibition using BG45 is not cytotoxic towards HS-5 as measured  
269 by CCK-8 at 48 and 72H.

**Figure S4**

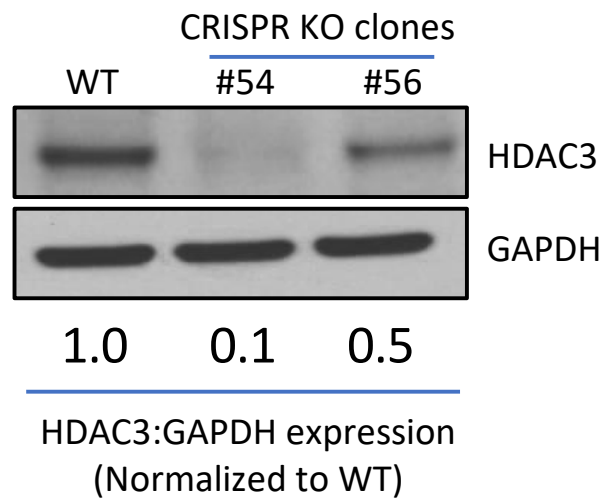

270

271

272

273

274

275

276 **Figure S4: Western blot showing successful mono-allelic and bi-allelic CRISPR-Cas9 mediated**

277 **KO of HDAC3.**

278 Western blot showing successful mono-allelic and bi-allelic KO of HDAC3. Quantification was

279 performed using ImageJ.



Figure S5

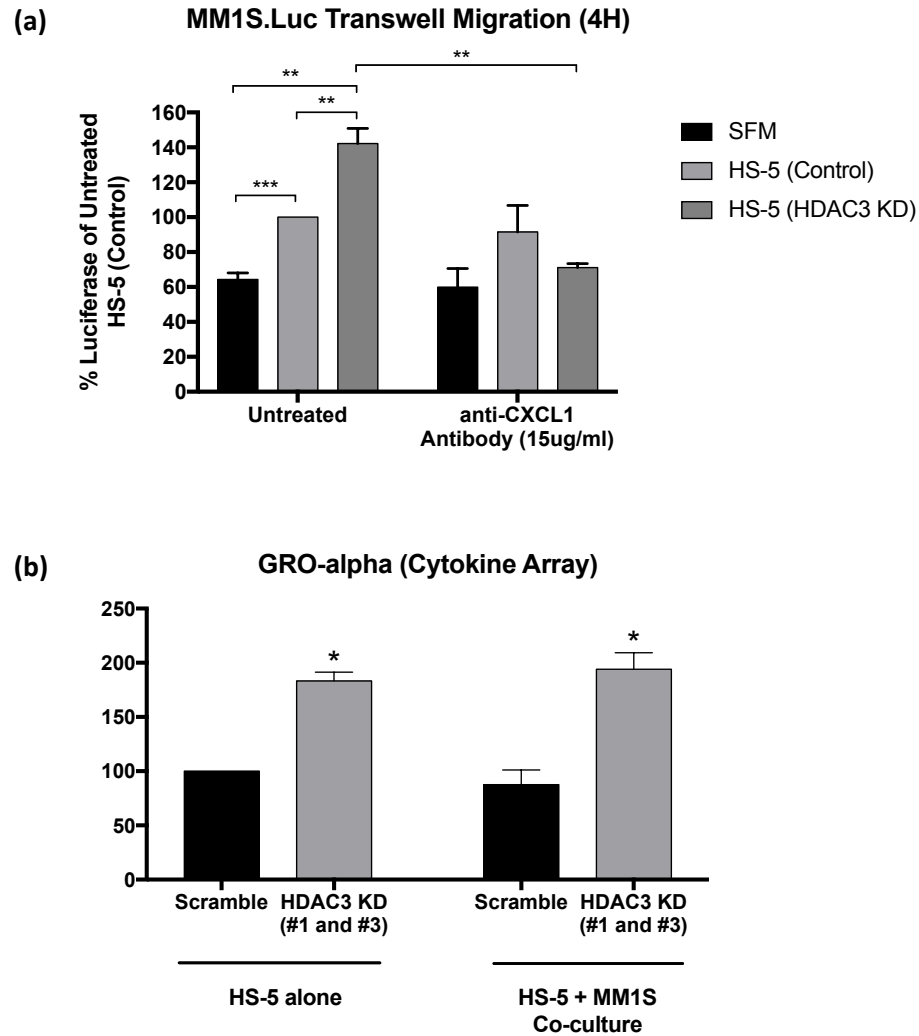

280

281 **Figure S5: HDAC3 silencing in HS-5 results in significant increase in migration of MM cells**

282 **(a)** Transwell migration studies were performed. Briefly, HS-5 was plated on the bottom chamber

283 overnight while MM1S.Luc was seeded into the upper chamber (8 $\mu$ m pores; Costar). HDAC3

284 silencing in HS-5 led to an increase in MM chemotaxis which was inhibited by 15ug/ml of anti-

285 CXCL1 antibody. **(b)** Cytokine array performed revealed a 1.9-fold increase in GRO-alpha (CXCL1)

286 secreted when HDAC3 is silenced in HS-5 in the co-culture setting.

Figure S6

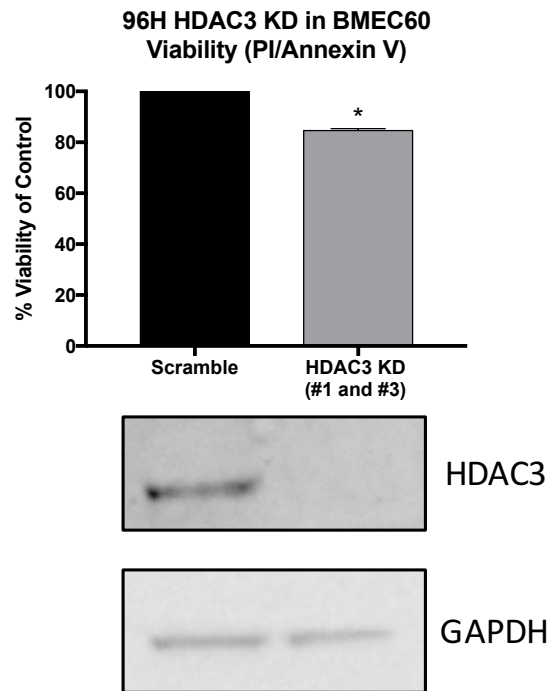

287

288

289

290

291 **Figure S6: HDAC3 silencing in BMEC60 endothelial cell line resulted in a modest decrease in**

292 **viability**

293 HDAC3 silencing in BMEC60 endothelial cell line resulted in a modest decrease in viability as

294 measured by PI/Annexin V flow cytometric analysis. Western blot showing knockdown of HDAC3

295 in BMEC60 at 96H.

**Figure S7**

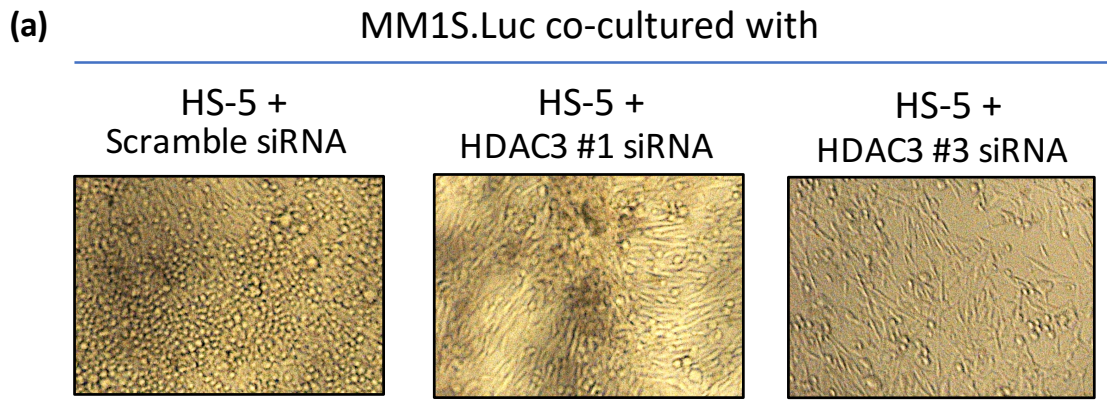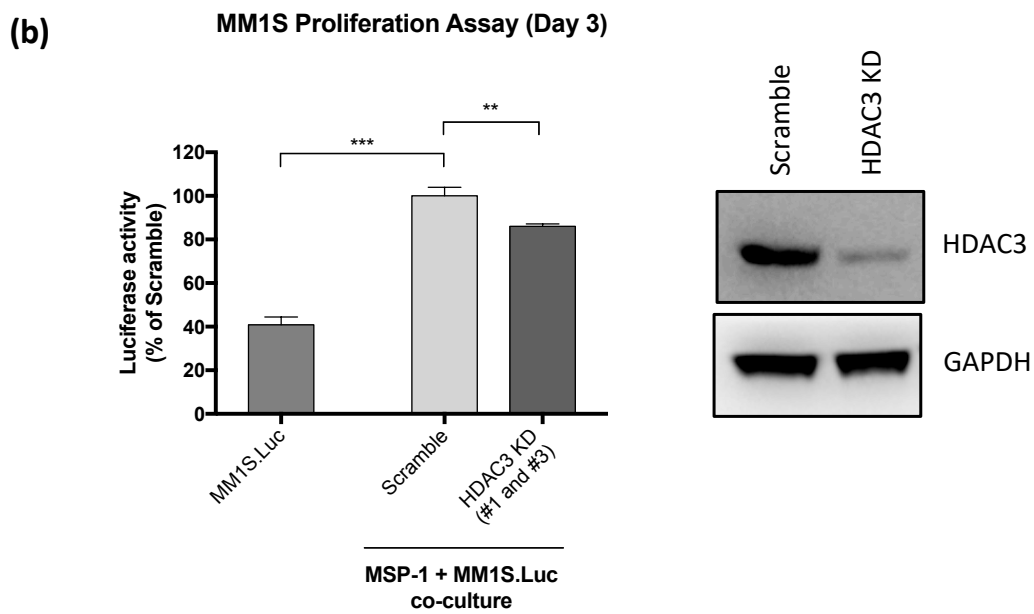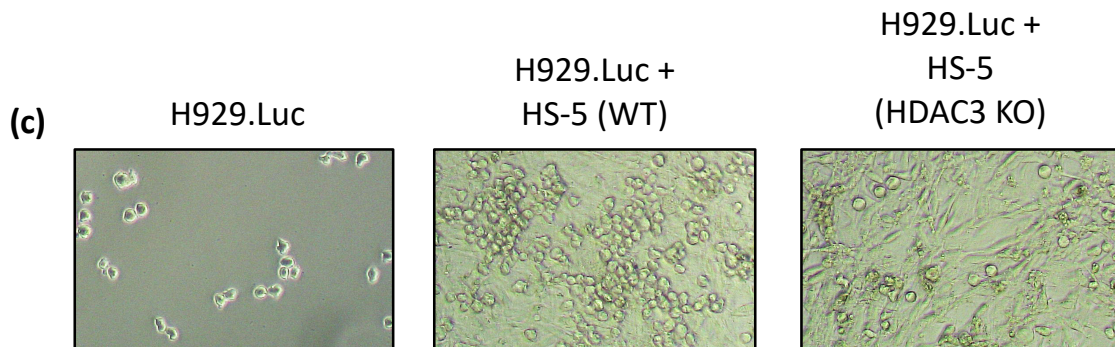

298 **Figure S7: HDAC3 silencing in BMSC cell lines decreases MM proliferation**

299 **(a)** HDAC3 siRNA knockdown in HS-5 significantly inhibits MM1S.Luc proliferation. Representative  
300 bright-field images of MM1S.Luc cells cultured with scrambled (left panel), HDAC3 #1 siRNA  
301 (middle panel), or HDAC3 #3 siRNA (right panel) HS-5. **(b)** HDAC3 knockdown in MSP-1  
302 significantly inhibits MM1S.Luc proliferation (14% decrease in MM1S.Luc proliferation in HDAC3  
303 KD,  $p < 0.05$ ). **(c)** HDAC3 KO in HS-5 significantly inhibits H929.Luc proliferation. Representative  
304 bright-field images of H929.Luc cultured alone (left panel) or with HS-5 (WT) (middle panel) or  
305 HS-5 (HDAC3 KO) (right panel).

**Figure S8**

**(a) MM1S Proliferation Assay (Day 4)**

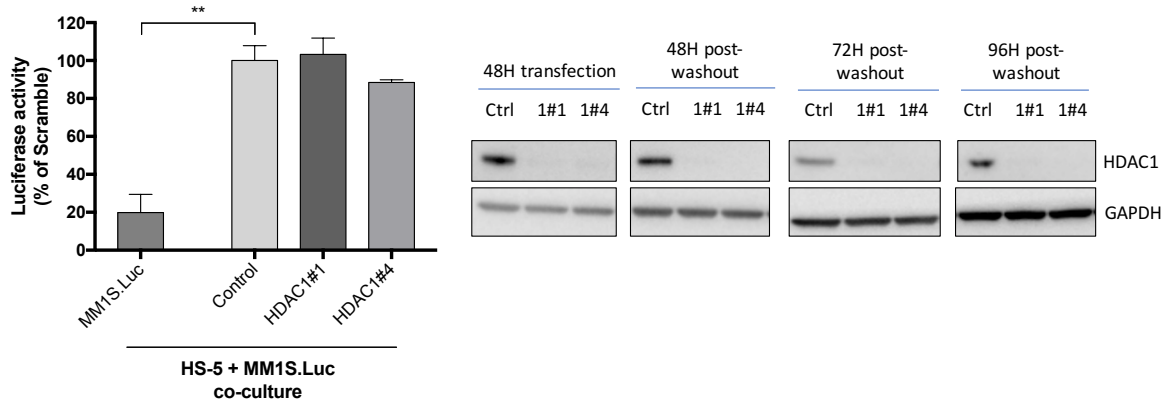

**(b) MM1S Proliferation Assay (Day 4)**

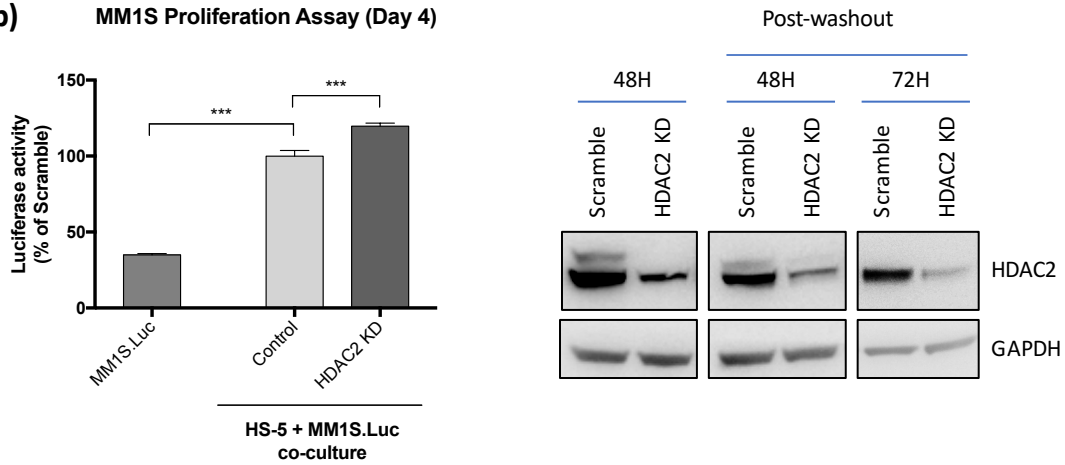

**(c) IC<sub>50</sub> values of BG45 against the deacetylase activity of recombinant HDAC1-3 and HDAC6**

|             | HDAC1 | HDAC2 | HDAC3 | HDAC6 |
|-------------|-------|-------|-------|-------|
| <b>BG45</b> | 2μM   | 2.2μM | 289nM | >20μM |

307 **Figure S8: Experiments showing that treatment of HS-5 with 2 $\mu$ M BG45 results in MM growth**  
308 **inhibition due to on-target HDAC3 inhibition.**

309 **(a)** HDAC1 knockdown in HS-5 does not affect MM proliferation in the co-culture setting. **(b)**  
310 HDAC2 knockdown in HS-5 increases MM proliferation in the co-culture setting. Taken together,  
311 these results suggest that the MM growth inhibitory effect of BG45-treated HS-5 is due to on-  
312 target HDAC3 inhibition. **(c)** Table showing the IC<sub>50</sub> values of BG45 against HDAC1-3 and HDAC6.  
313 BG45 is a HDAC class-I inhibitor with selectivity for HDAC3 over HDAC1 and 2.

Figure S9

(a) BG45: MM1S Proliferation Assay (Day 2)

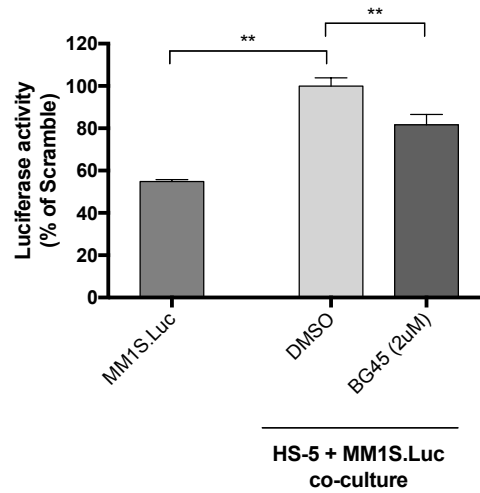

(b)

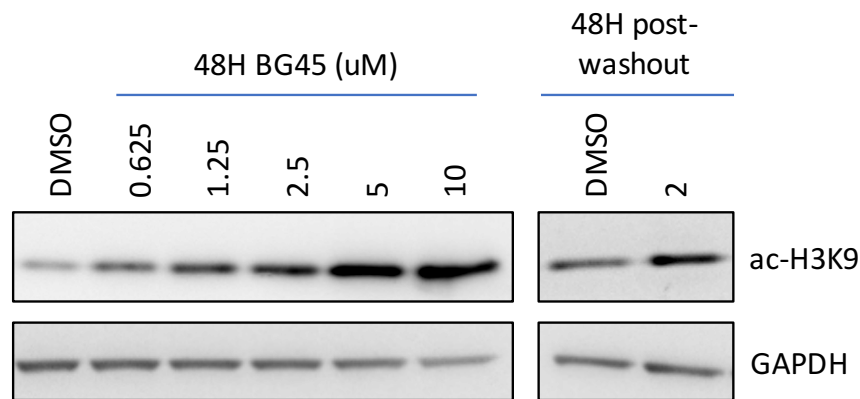

314

315 **Figure S9: BG45 mediated HDAC3-selective inhibition in BMSCs result in decrease MM**  
316 **proliferation in co-culture.**

317 **(a)** HDAC3 inhibition in HS-5 using 2µM BG45 led to a decrease in MM proliferation (18.3%  
318 decrease in MM proliferation in BG45 treated HS-5,  $p < 0.05$ ). **(b)** Western blot showing that 2µM  
319 of BG45 inhibits HDAC3 in HS-5 as evidenced by increased acetylated-H3K9 HDAC3 inhibition that  
320 persisted for 48H post-washout of BG45.

**Figure S10**

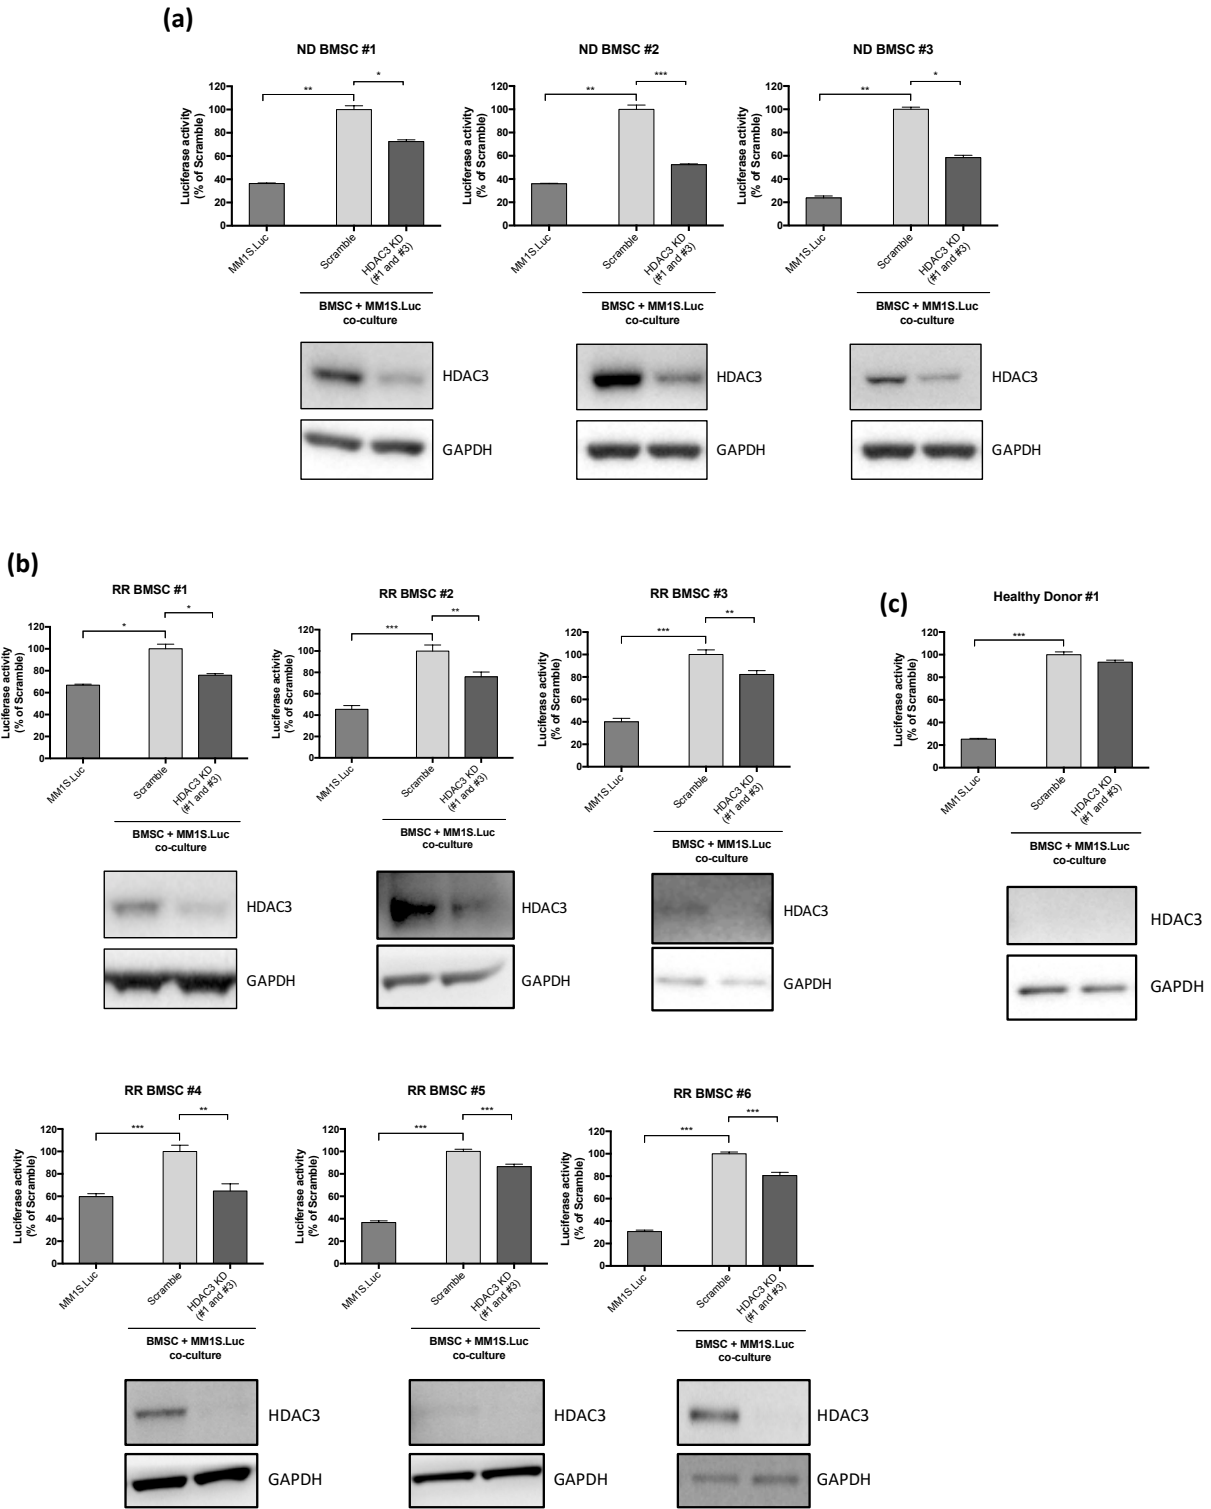



322 **Figure S10: HDAC3 KD in primary human BM stromal cells derived from newly-diagnosed MM**  
323 **(ND BMSC), and refractory-relapsed MM (RR BMSC) trigger significant MM cell growth**  
324 **inhibition in MM-MSC co-culture setting**

325 HDAC3 KD in **(a)** ND BMSC and **(b)** RR BMSC leads to significant decreases in MM1S.Luc  
326 proliferation (ND#1: 27.5% decrease in MM proliferation,  $p < 0.05$ ; ND#2: 47.7% decrease in MM  
327 proliferation,  $p < 0.05$ ; ND#3: 41.6% decrease in MM proliferation,  $p < 0.05$ ); (RR#1: 24% decrease  
328 in MM proliferation,  $p < 0.05$ ; RR#2: 24.2% decrease in MM proliferation,  $p < 0.05$ ; RR#3: 17.8%  
329 decrease in MM proliferation,  $p < 0.05$ ; RR#4: 35.2% decrease in MM proliferation,  $p < 0.05$ ;  
330 RR#5: 13.6% decrease in MM proliferation,  $p < 0.05$ ; RR#6: 19.5% decrease in MM proliferation,  
331  $p < 0.05$ ). **(c)** HDAC3 KD in healthy donor-derived BMSC does not impact MM1S.Luc proliferation.

Figure S11

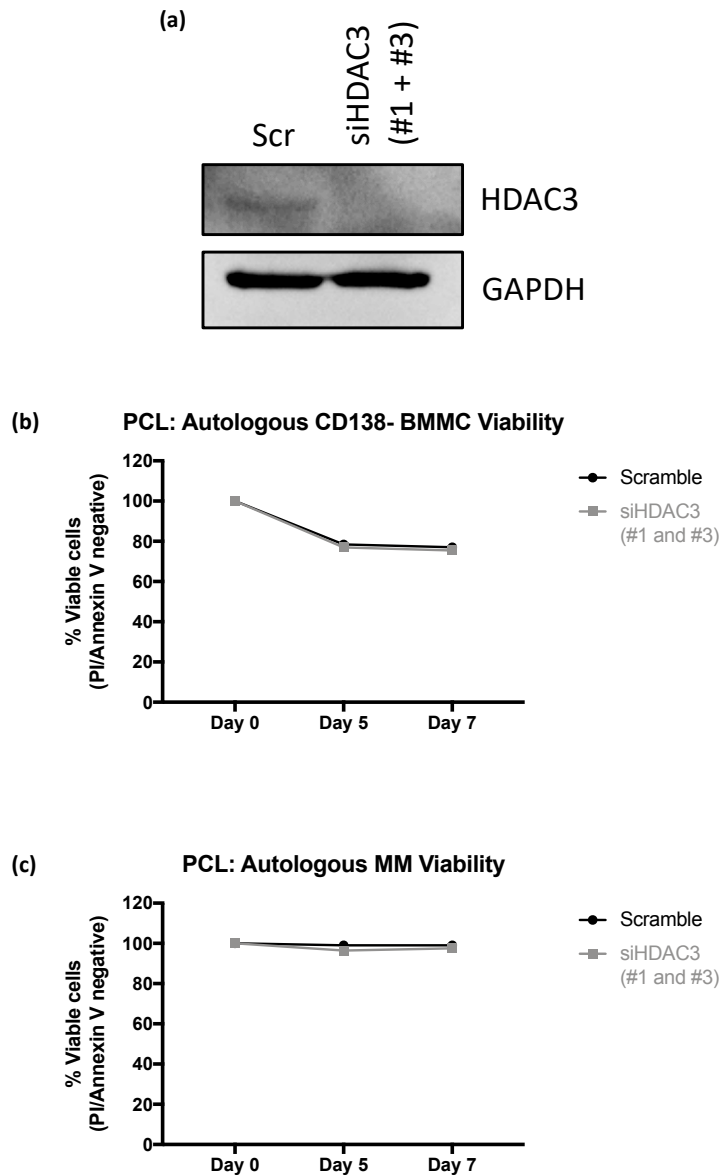

332

333 **Figure S11: HDAC3 KD in CD138- BMMCs trigger significant autologous CD138+ MM cell growth**  
334 **inhibition in an autologous co-culture setting**

335 **(a)** Western blot from CD138 negative BMMC lysate showing successful KD of HDAC3 in BMMC.

336 **(b)** Chart showing viability over time of CD138 negative BMMC and **(c)** CD138 positive MM cells

337 in scrambled and HDAC3 KD co-culture.

Figure S12

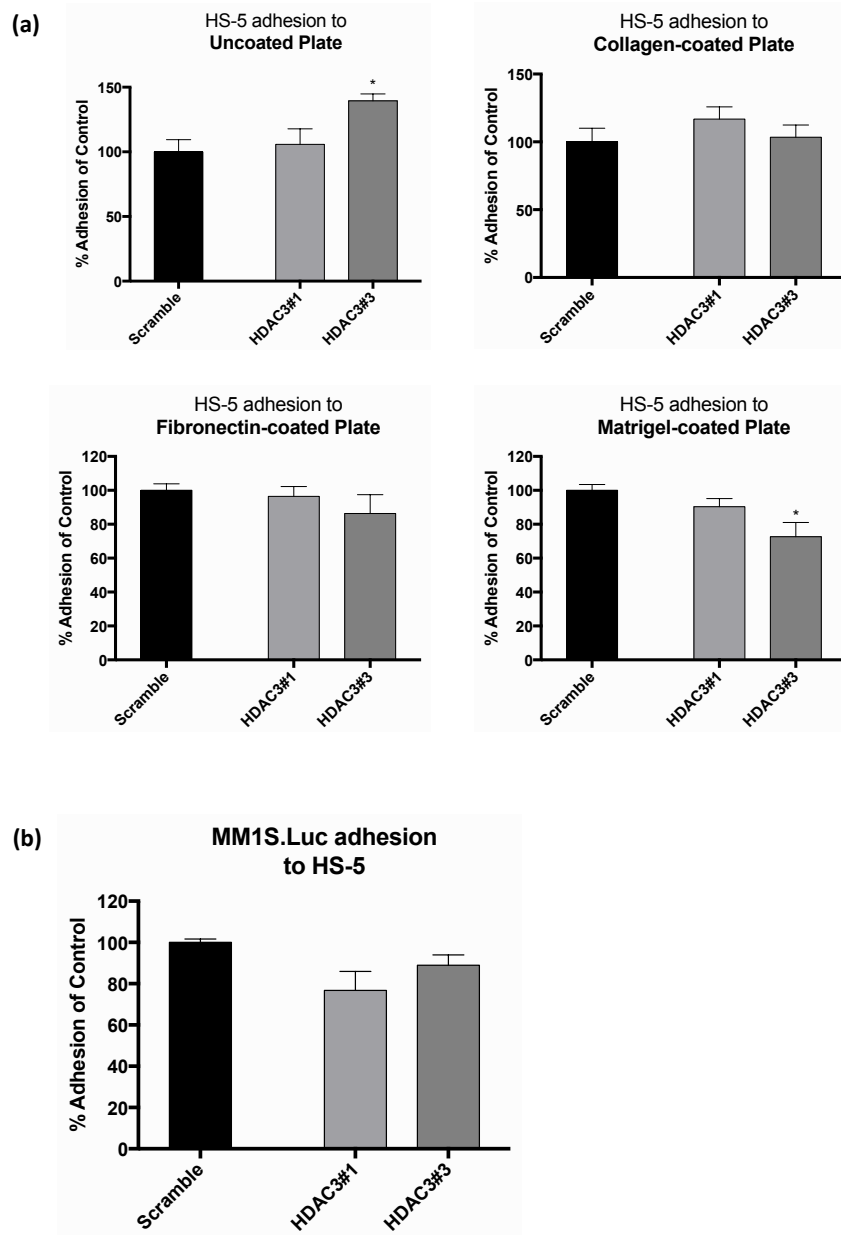

338

339 **Figure S11: HDAC3 silencing in HS-5 does not impact HS-5 plate adhesion or MM1S.Luc**  
340 **adhesion**

341 **(a)** HDAC3 siRNA knockdown does not impact HS-5 adhesion to uncoated, collagen, fibronectin,  
342 or matrigel-coated plate surfaces. **(b)** HDAC3 siRNA knockdown in HS-5 does not alter MM1S.Luc  
343 adhesion to HS-5.

Figure S13

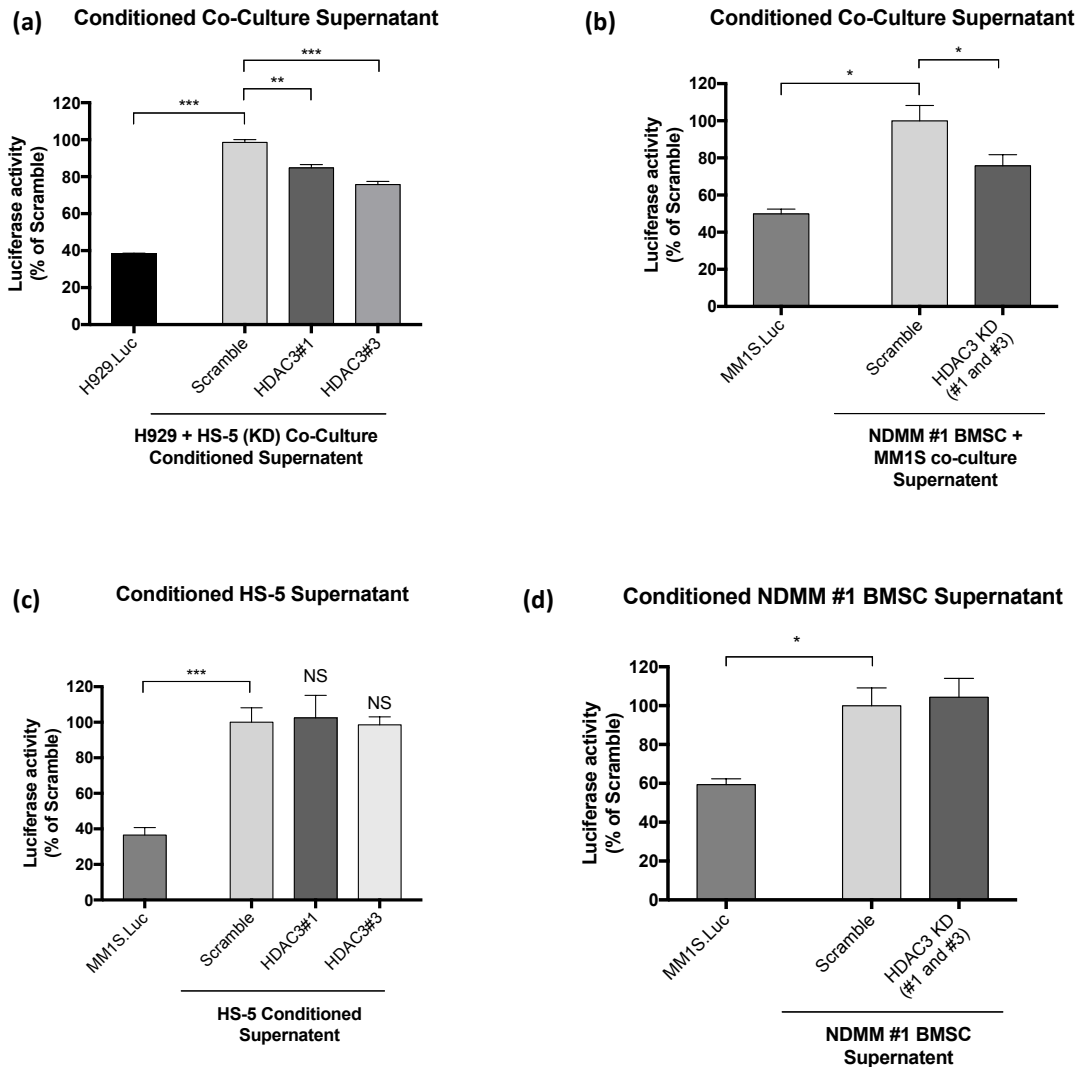

344

345 **Figure S13: Paracrine-autocrine loop between HDAC3 KD BMSC and MM cells lead to inhibition**  
 346 **of MM proliferation**

347 **(a)** Conditioned media (CM) obtained from the co-culture of HDAC3 KD HS-5 and H929.Luc

348 significantly inhibited H929.Luc proliferation. **(b)** CM obtained from the co-culture of HDAC3 KD

349 NDMM-derived BMSC and MM1S.Luc significantly inhibited MM1S.Luc proliferation. **(c)** The CM

350 from HDAC3 KD HS-5 alone does not have any anti-proliferative effect on MM1S.Luc. **(d)** CM from

351 HDAC3 KD NDMM-derived BMSC cells alone failed to show an anti-proliferative effect.

Figure S14

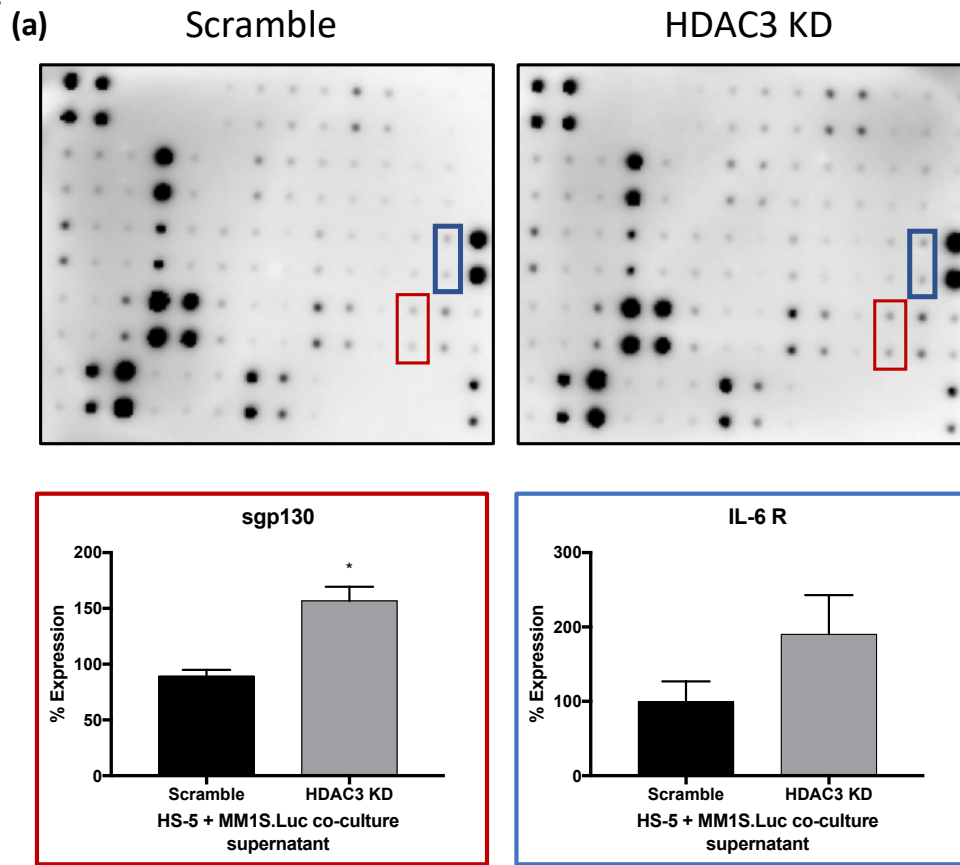

(b)

|                | HS-5 + MM1S.Luc co-culture |     |                        |     |          |                                           |
|----------------|----------------------------|-----|------------------------|-----|----------|-------------------------------------------|
|                | Scramble (Fold Change)     |     | HDAC3 KD (Fold change) |     | p value  | Average Fold change of HDAC3KD vs Control |
|                | N=1                        | N=2 | N=1                    | N=2 |          |                                           |
| bFGF           | 1.1                        | 1.2 | 2.5                    | 3.3 | 0.044600 | 2.5                                       |
| GRO-alpha      | 1.0                        | 0.7 | 2.1                    | 1.8 | 0.034692 | 1.9                                       |
| sgp130         | 0.9                        | 0.8 | 1.4                    | 1.7 | 0.039560 | 1.8                                       |
| IL-2 Ra        | 0.9                        | 0.9 | 1.9                    | 1.7 | 0.008508 | 1.8                                       |
| sTNF RII       | 1.0                        | 0.8 | 1.6                    | 1.5 | 0.043514 | 1.7                                       |
| Amphiregulin   | 1.0                        | 1.0 | 1.6                    | 1.7 | 0.003449 | 1.6                                       |
| axl            | 1.5                        | 1.3 | 2.1                    | 2.4 | 0.033162 | 1.6                                       |
| Acrp30         | 1.1                        | 1.2 | 1.6                    | 1.5 | 0.037029 | 1.6                                       |
| Angiopoietin-2 | 1.1                        | 1.1 | 1.6                    | 1.4 | 0.037380 | 1.5                                       |
| IL-1 R4/ST2    | 1.2                        | 1.2 | 1.5                    | 1.6 | 0.005805 | 1.3                                       |
| IGFBP-2        | 1.0                        | 0.9 | 1.4                    | 1.3 | 0.023386 | 1.4                                       |
| IGFBP-1        | 1.0                        | 1.1 | 1.5                    | 1.5 | 0.025169 | 1.4                                       |
| VEGF-D         | 0.9                        | 0.9 | 1.1                    | 1.2 | 0.046389 | 1.3                                       |
| I-TAC (CXCL11) | 0.7                        | 0.7 | 0.9                    | 0.9 | 0.018209 | 1.2                                       |

353 **Figure S14: Cytokine profiling of supernatant derived from HDAC3-silenced HS-5 stromal cells**  
354 **co-cultured with MM1S.Luc using RayBiotech C-series cytokine array.**

355 **(a)** Cytokine profiling performed on supernatant derived from HS-5 (HDAC3 KD) + MM1S.Luc co-  
356 culture revealed a 1.8-fold increase in soluble-gp130 compared to control. **(b)** The table above  
357 shows the significant changes ( $p < 0.05$ ;  $n=2$  experiments) in cytokines released when HDAC3 was  
358 silenced in HS-5 cultured alone or with MM1S.Luc. Fold change was calculated by normalizing OD  
359 values to HS-5 (Scramble) alone.

Figure S15

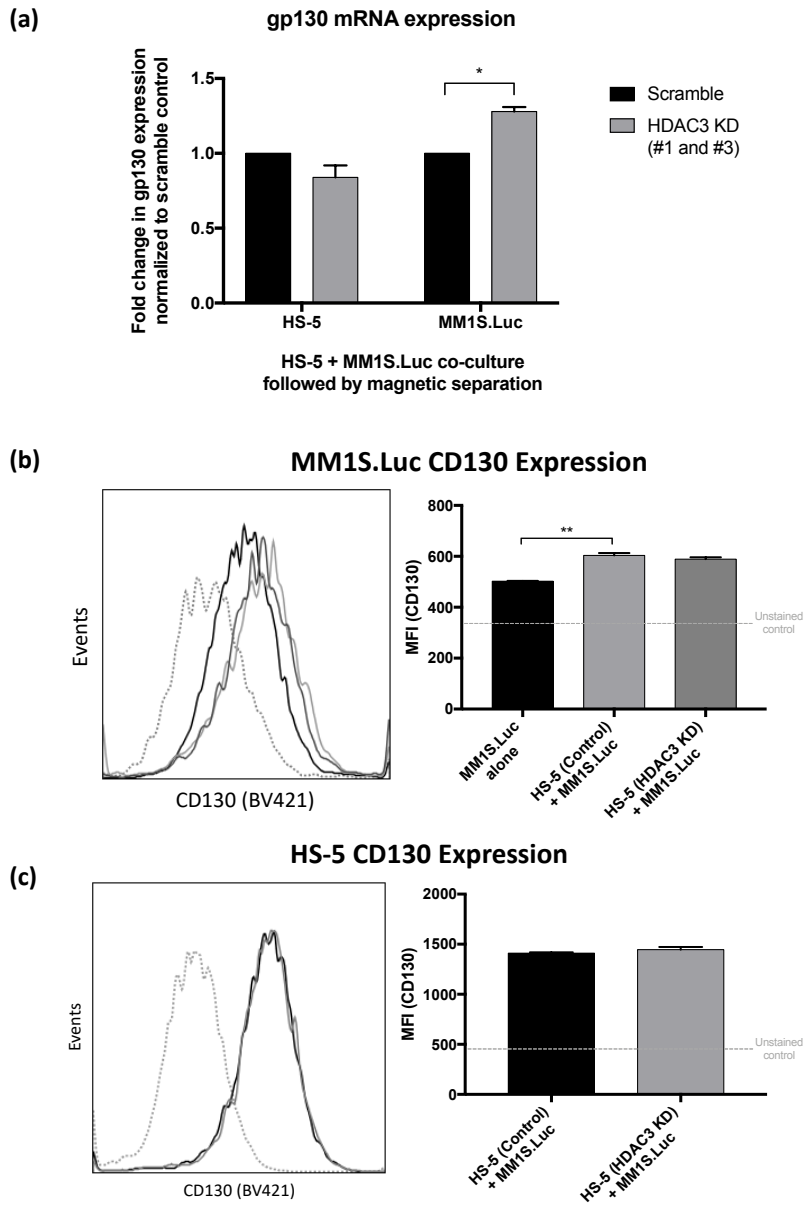

360

361 **Figure S15: Conditioned supernatant from HDAC3 KD HS-5 plus MM1S.Luc co-culture triggers**  
362 **significant MM cell growth inhibition through the attenuation of IL-6 trans-signaling.**

363 **(a)** RT-PCR performed on MM1S.Luc after magnetic separation from co-culture with HS-5 shows  
364 that HDAC3-silencing in HS-5 results in a 1.3-fold increase in MM1S.Luc gp130 mRNA expression.  
365 Flow cytometry analysis of cell surface gp130 shows that HDAC3-silencing in HS-5 does not alter  
366 surface expression of gp130 in both **(b)** MM1S.Luc and **(c)** HS-5.

**Figure S16**

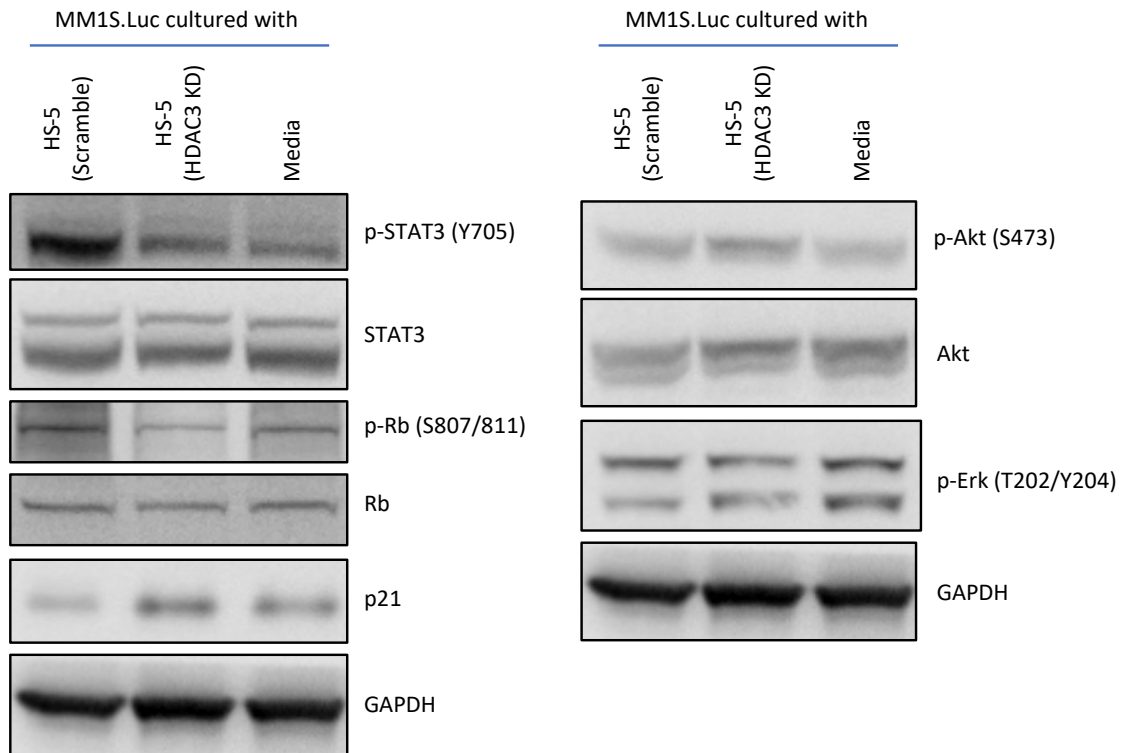

367

368

369 **Figure S16: Western blot analysis showing changes in MM expression of key signaling proteins**

370 **involved in the IL-6 trans-signaling pathway when HDAC3 was silenced in BMSCs**

371 Western blot analysis showing that HDAC3 KD in HS-5 abrogates BMSC-induced STAT3 signaling

372 in MM1S.Luc cells. No changes in ERK or Akt signaling were observed. GAPDH was used as loading

373 control.



Figure S17

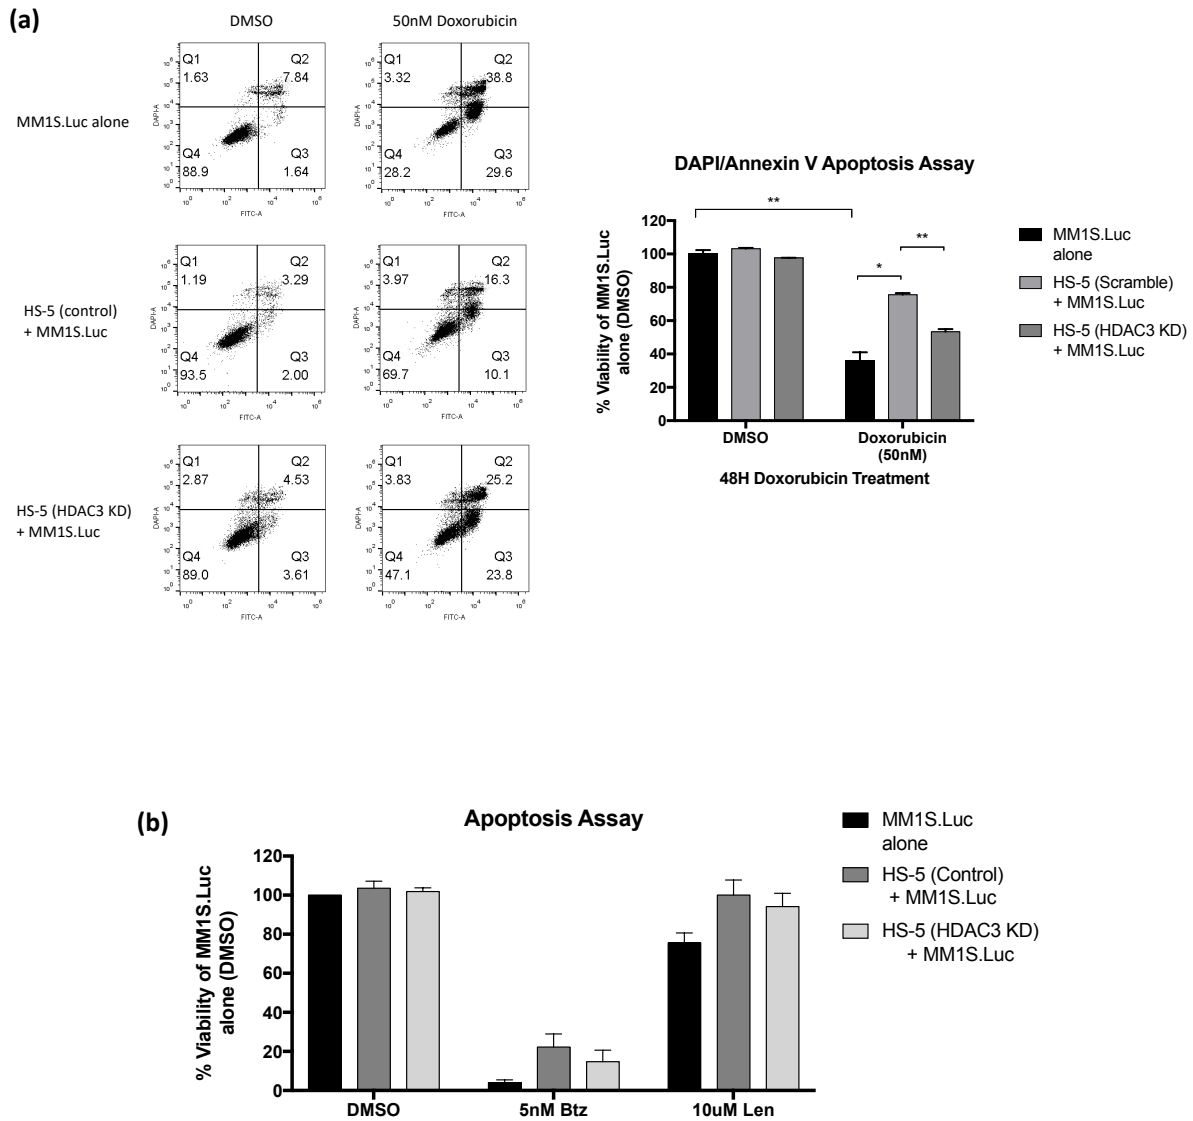

374

375 **Figure S17: HDAC3 KD in HS-5 overcomes MM1S.Luc cell adhesion mediated-drug resistance**

376 **(CAM-DR) to Doxorubicin**

377 **(a)** HDAC3 silencing in HS-5 attenuated CAM-DR against doxorubicin. **(b)** HDAC3 silencing in HS-

378 5 does not impact MM1S.Luc sensitivity to bortezomib or lenalidomide.

**Figure S18**

**(a)**

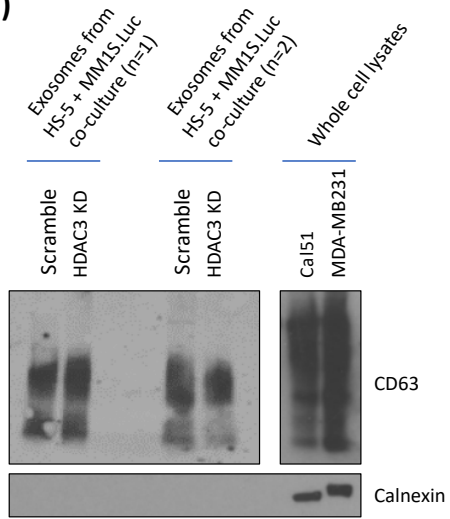

**(b)**

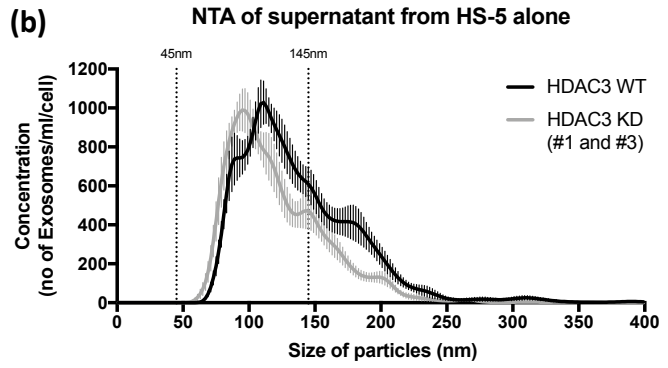

**(c)**

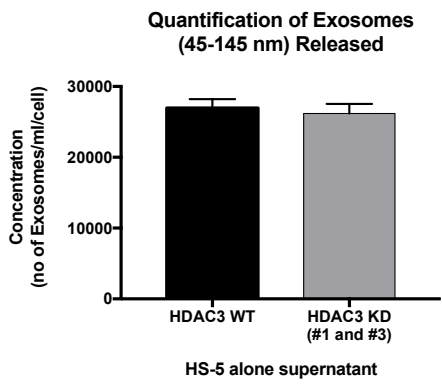

**(d)**

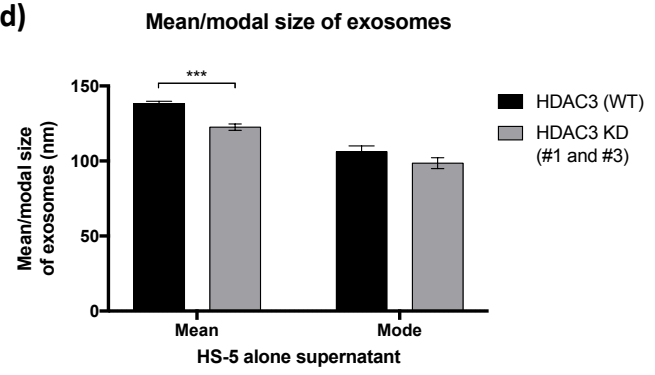

**(e)**

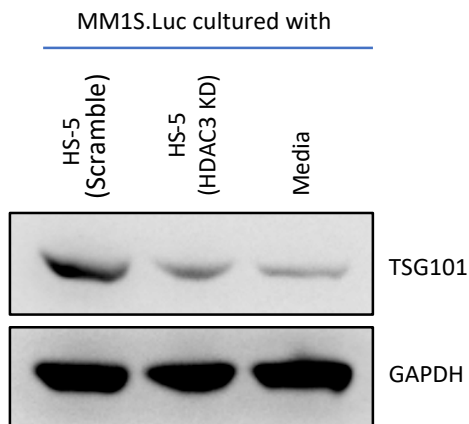

**(f)**

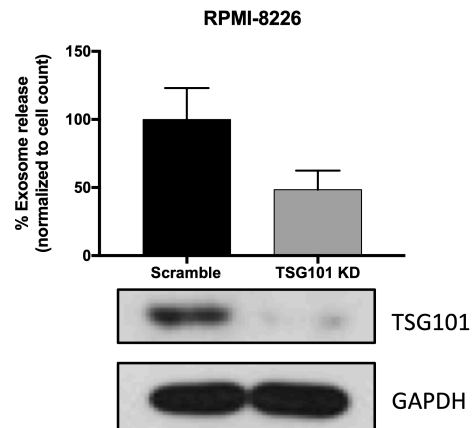

380 **Figure S18: Qualitative and quantitative changes in exosomes derived from HDAC3 KD HS-5**  
381 **plus MM1S.Luc co-culture supernatant contributes to MM cell growth arrest**  
382 **(a)** Western blot analysis showing that the exosomes isolated from the conditioned media using  
383 Qiagen exoEasy kit were positive for exosomal marker CD63 but negative for calnexin. Whole cell  
384 lysates from Cal51 and MDA-MB231 serve as positive controls. **(b)** Nanoparticle tracking analysis  
385 (NTA) showing the mean/modal size and concentration of exosomes in the supernatant of HS-5  
386 (HDAC3 KD) vs HS-5 (HDAC3 WT) cultured alone. **(c)** HDAC3 knockdown in HS-5 does not affect  
387 the quantity of exosomes secreted by HS-5 alone. **(d)** HDAC3 knockdown in HS-5 led to a small  
388 but significant decrease in the mean size of exosomes secreted by HS-5 without affecting the  
389 modal size of exosomes. **(e)** Western blot validation of reduced TSG101 expression in MM1S.Luc  
390 co-cultured with HDAC3-silenced HS-5. **(f)** siRNA knockdown of TSG101 in RPMI-8226 resulted in  
391 decreased exosome secretion as measured by NTA. Data was normalized to cell count for each  
392 condition.

Figure S19a

HS-5: Scramble siRNA HS-5 vs HDAC3 KD HS-5

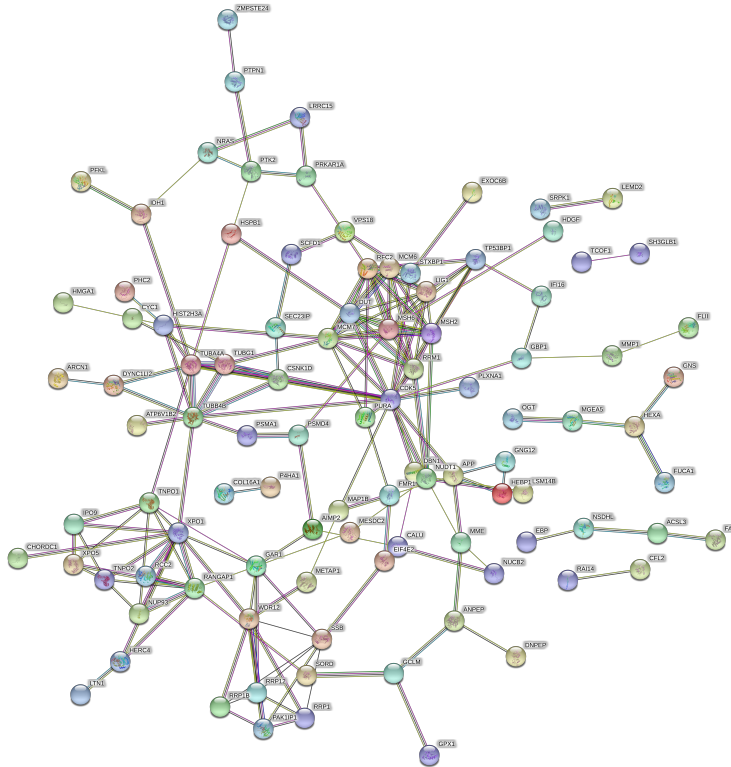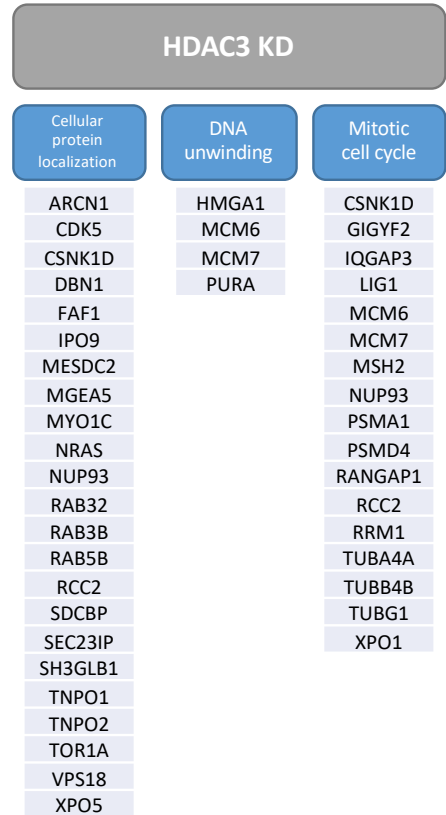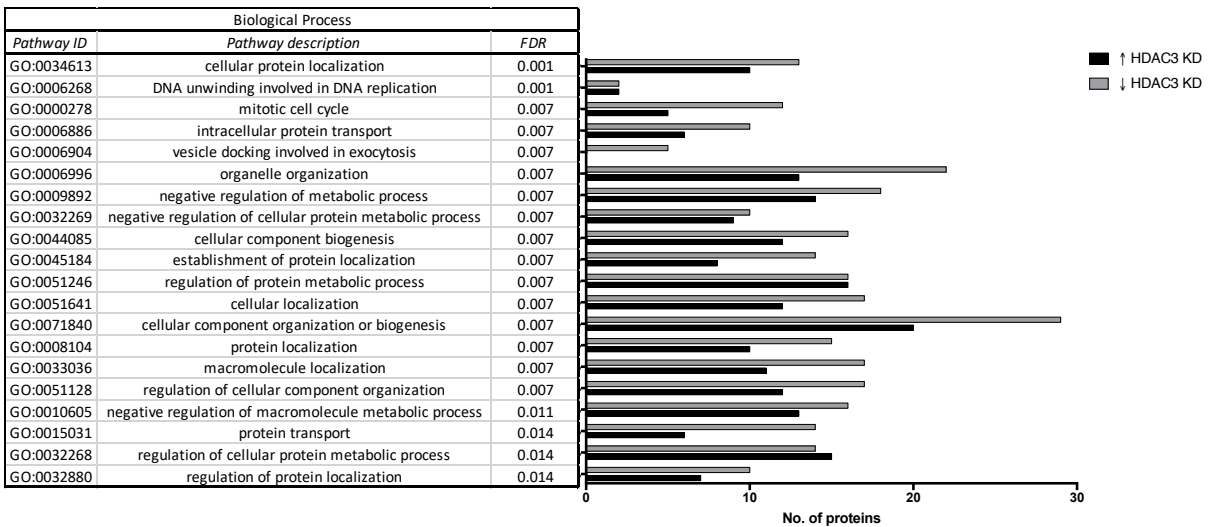

Figure S19b

HS-5: Scramble siRNA HS-5 + MM1S.Luc vs  
HDAC3 KD HS-5 + MM1S.Luc

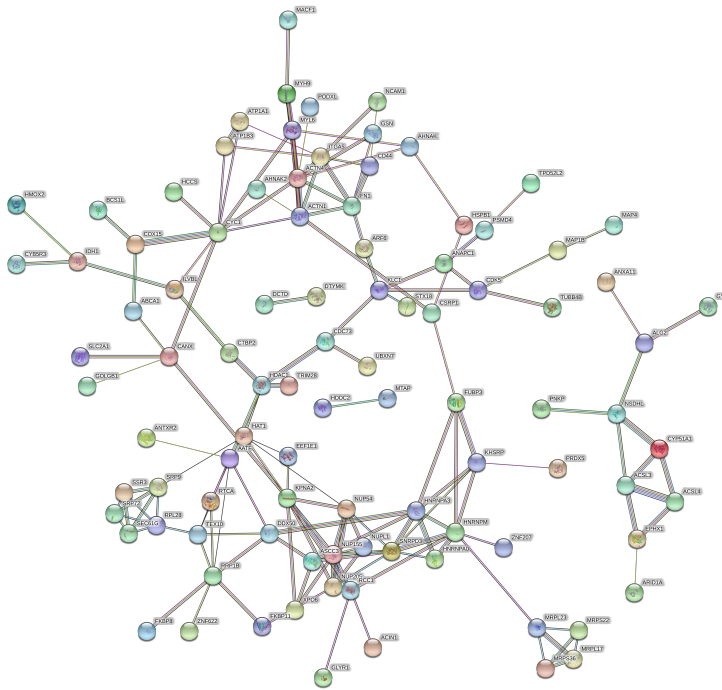

HDAC3 KD

| Cellular component disassembly | Complex subunit organization | Translation |
|--------------------------------|------------------------------|-------------|
| ACIN1                          | ABCA1                        | EEF1E1      |
| ARID1A                         | ACSL3                        | EIF1        |
| CD44                           | ACTN4                        | MRPL17      |
| FN1                            | AHNAK                        | MRPL23      |
| GSN                            | ARID1A                       | MRPS22      |
| KLC1                           | BCS1L                        | MRPS36      |
| MRPL17                         | CDC73                        | RPL28       |
| MRPL23                         | COX15                        | SEC61G      |
| MRPS22                         | FAM103A1                     | SRP72       |
| MRPS36                         | FN1                          | SRP9        |
| NUP155                         | HAT1                         | SSR3        |
| NUP205                         | HDAC1                        |             |
| NUP54                          | HOOK3                        |             |
| NUPL1                          | KLC1                         |             |
| RPL28                          | MAP4                         |             |
|                                | MRPL17                       |             |
|                                | MRPL23                       |             |
|                                | MRPS22                       |             |
|                                | MRPS36                       |             |
|                                | MYH9                         |             |
|                                | NUP205                       |             |
|                                | NUP54                        |             |
|                                | NUPL1                        |             |
|                                | RCC1                         |             |
|                                | RPL28                        |             |
|                                | SLC2A1                       |             |
|                                | SNRPD3                       |             |
|                                | TRIM28                       |             |
|                                | TUBB4B                       |             |

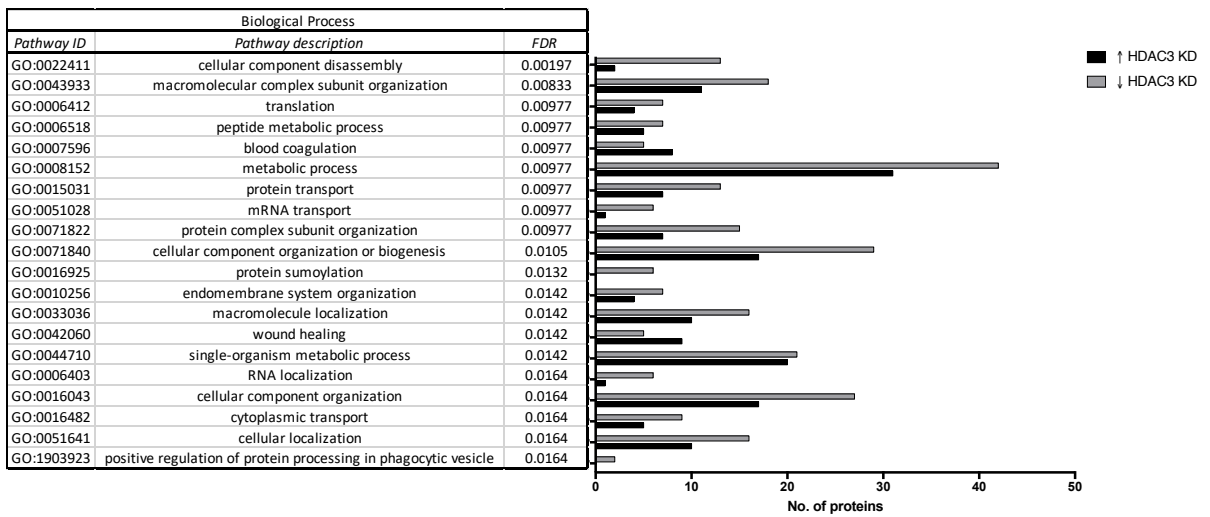

Figure S19c

MM1S.Luc: Scramble siRNA HS-5 + MM1S.Luc vs  
HDAC3 KD HS-5 + MM1S.Luc

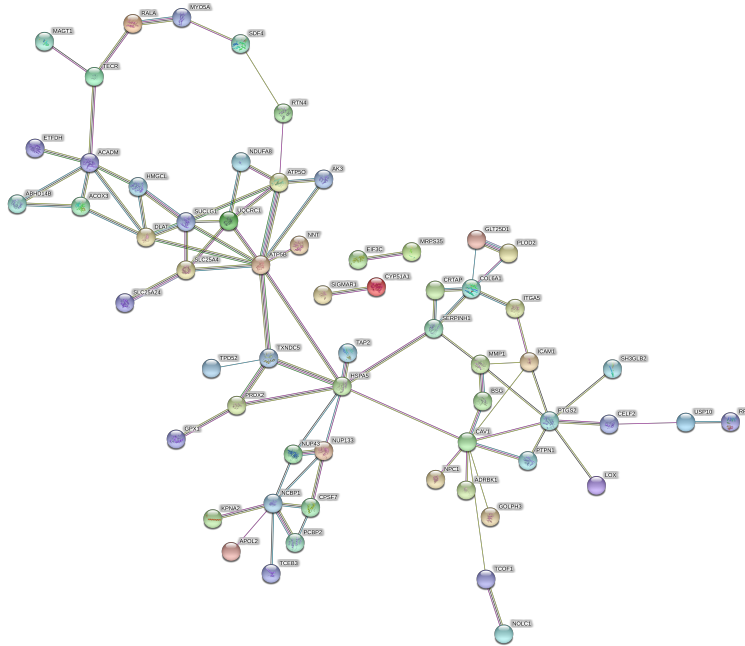

HDAC3 KD

| Organism metabolic process | Redox process | Small mol. Metabolic process |
|----------------------------|---------------|------------------------------|
| ACADM                      | ACADM         | ACADM                        |
| ADRBK1                     | ASPH          | ACOX3                        |
| AK3                        | ATP5B         | AK3                          |
| APOL2                      | ATP5O         | APOL2                        |
| ASPH                       | CYP51A1       | ATP5B                        |
| ATP5O                      | DHRS7         | ATP5O                        |
| BSG                        | DLAT          | BSG                          |
| CAV1                       | ETFDH         | CAV1                         |
| COL6A1                     | GPX1          | CRTAP                        |
| CRTAP                      | LOX           | CYP51A1                      |
| CYP51A1                    | NDUFA8        | ETFDH                        |
| DHRS7                      | NNT           | GPX1                         |
| ETFDH                      | PLOD2         | HDLBP                        |
| GPX1                       | PPOX          | HMGCL                        |
| GPX1                       | PRDX2         | LGMN                         |
| HDLBP                      | PTGS2         | MYO5A                        |
| HMGCL                      | PYCR2         | NDUFA8                       |
| HSPA5                      | SLC25A4       | NNT                          |
| LGMN                       | SUCLG1        | NPC1                         |
| LOX                        | TECR          | NUP133                       |
| MAGT1                      |               | NUP43                        |
| MMP1                       |               | PCYT1A                       |
| MRPS35                     |               | PPOX                         |
| MYO5A                      |               | PTGS2                        |
| NDUFA8                     |               | PYCR2                        |
| NNT                        |               | SLC25A4                      |
| NPC1                       |               | TECR                         |
| NUP133                     |               |                              |
| NUP43                      |               |                              |
| PCYT1A                     |               |                              |
| PLOD2                      |               |                              |
| PPOX                       |               |                              |
| PRDX2                      |               |                              |
| PTGS2                      |               |                              |
| PTPN1                      |               |                              |
| PYCR2                      |               |                              |
| RFC5                       |               |                              |
| SERPINH1                   |               |                              |
| SLC25A4                    |               |                              |
| SUPV3L1                    |               |                              |
| TMEM165                    |               |                              |
| UBE2D3                     |               |                              |
| USP10                      |               |                              |

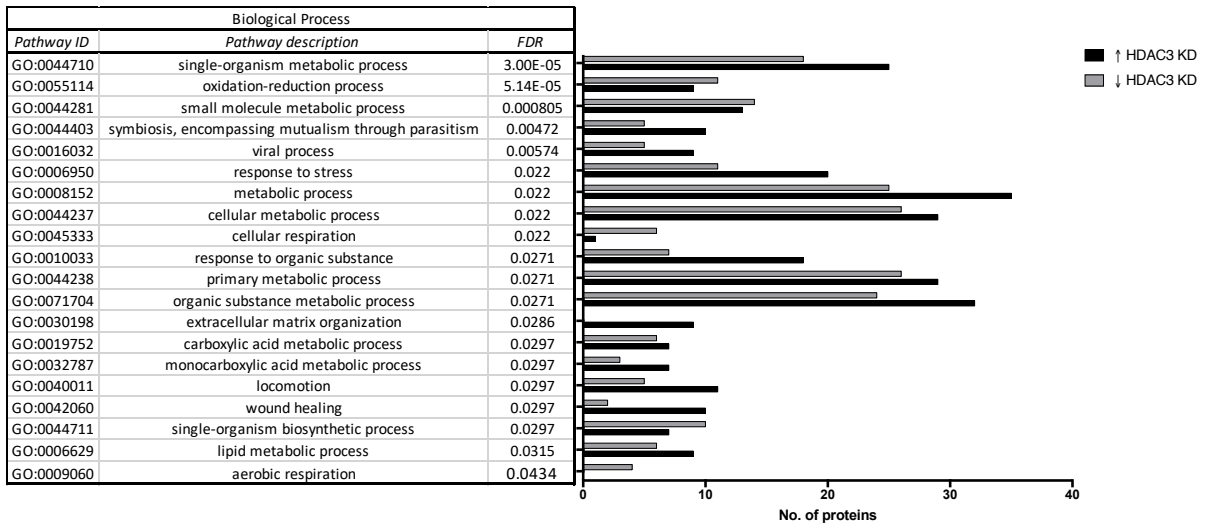

396 **Figure S19: Mass-spectrometry analysis**

397 Protein-protein interactions from the STRING interaction database. Proteins are represented as  
398 nodes. Disconnected nodes and low  $p$ -value interactions were filtered out. Proteins were also  
399 classified based on Gene Ontology (GO) biological processes. **(a)** Mass spectrometry analysis of  
400 scramble siRNA vs HDAC3 KD HS-5 cells cultured alone. **(b)** Mass spectrometry analysis of  
401 scramble siRNA vs HDAC3 KD HS-5 cells separated from the co-culture with MM1S.Luc. **(c)** Mass  
402 spectrometry analysis of MM1S.Luc cells separated from the co-culture with scramble siRNA vs  
403 HDAC3 KD HS-5 cells.

**Figure S20**

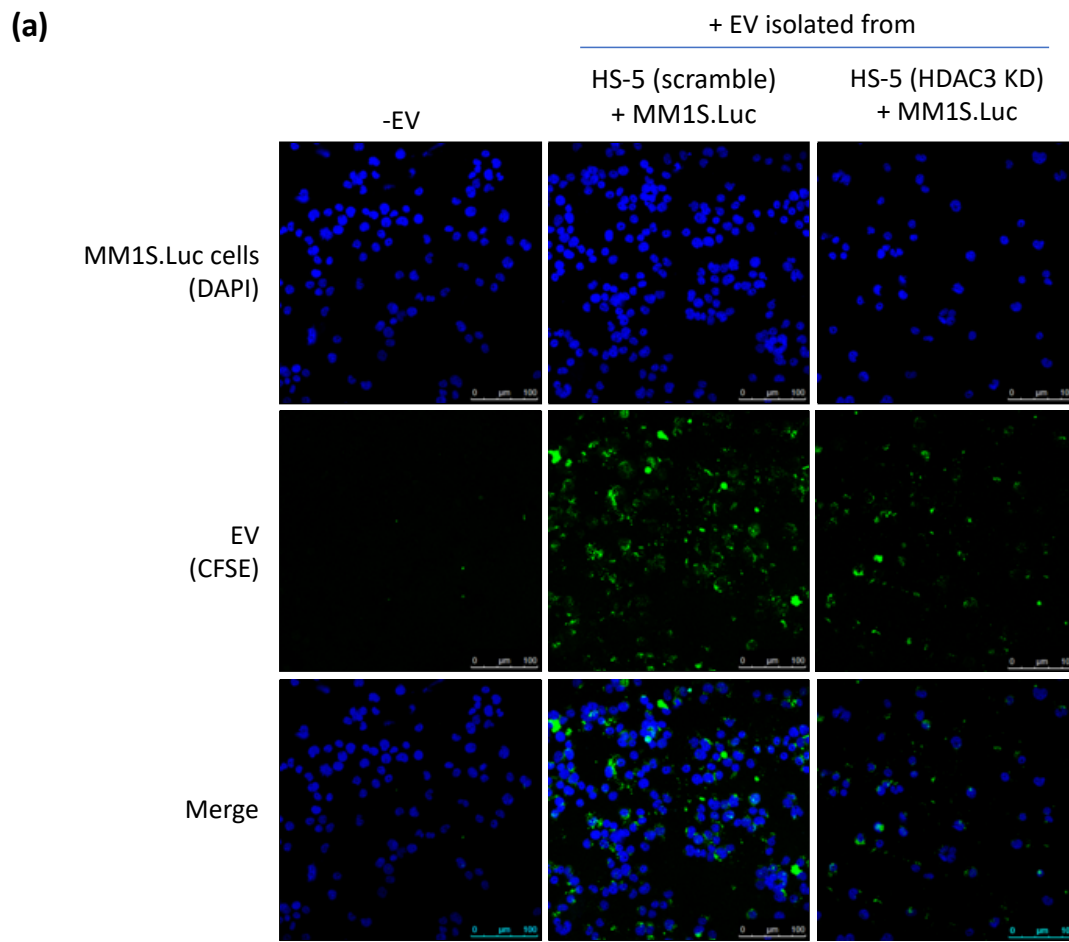

**(b)** MM1S.Luc co-cultured with CFSE-labelled EV (6H)

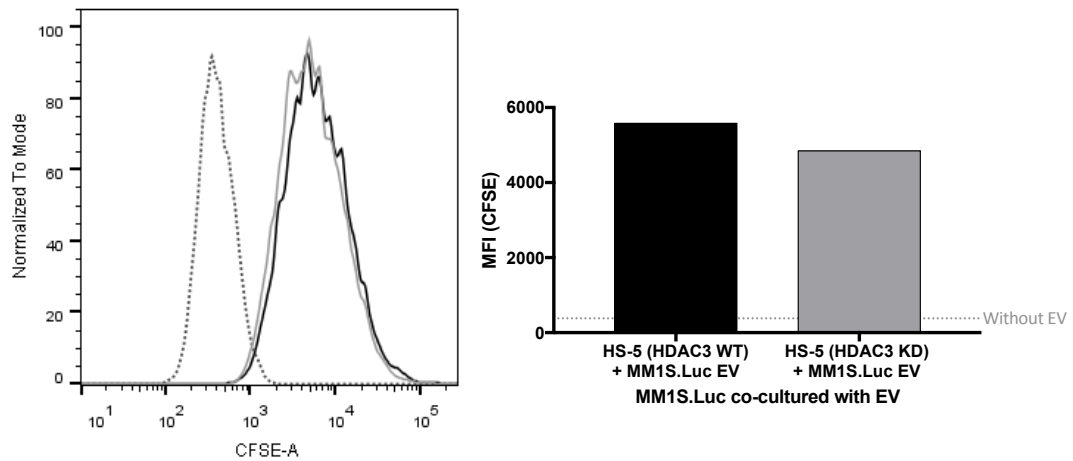



405 **Figure S20: Confocal microscopy imaging and flow cytometric analysis showing uptake of**  
406 **exosomes into MM cells**  
407 **(a)** Confocal microscopy imaging showing the internalization of CFSE-labelled exosomes (green)  
408 into DAPI stained MM1S.Luc nuclei (blue). **(b)** Flow cytometric analysis showing uptake of CFSE-  
409 labelled exosomes into MM1S.Luc cells.

Figure S21

(a)

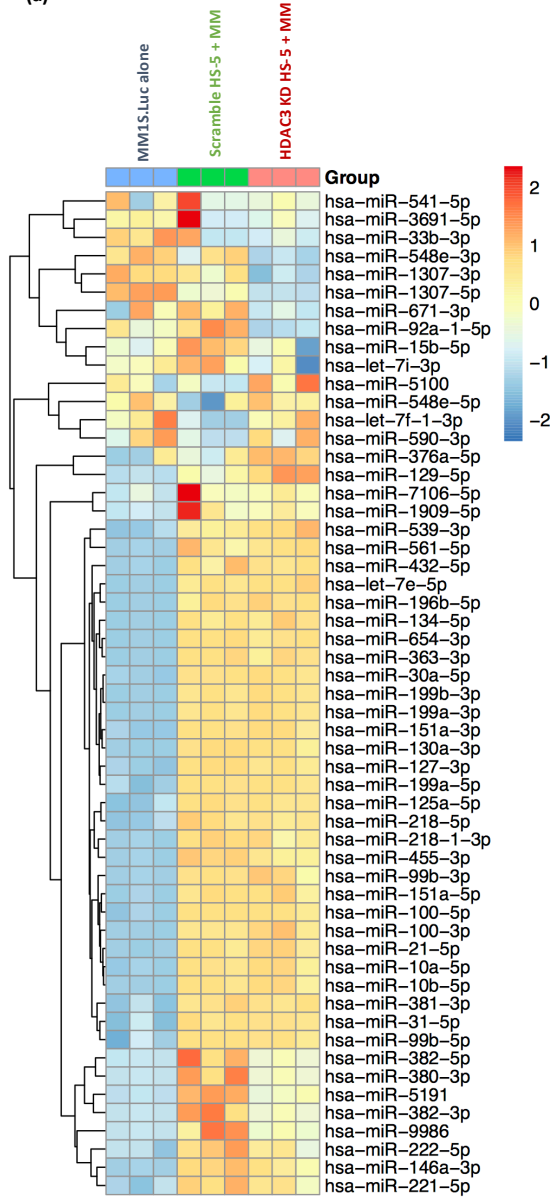

(b)

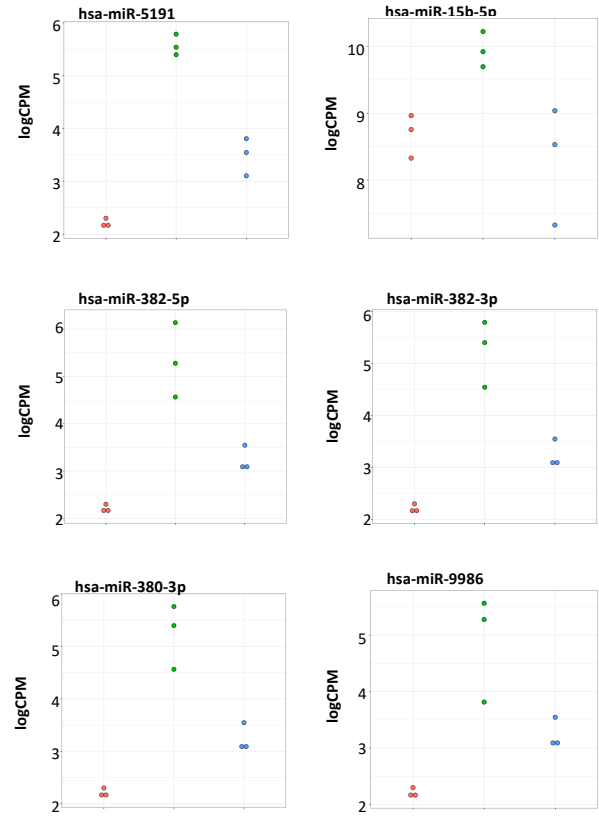

411 **Figure S21: miRNA sequencing of exosomes isolated from the conditioned supernatant of**  
412 **MM1S.Luc alone, scramble siRNA HS-5 plus MM1S.Luc, and HDAC3 KD HS-5 plus MM1S.Luc**  
413 **(a)** Hierarchical clustering analysis for the identified differentially expressed small RNAs. The  
414 horizontal axis represents the exosomes derived from MM1S.Luc alone, scramble siRNA HS-5 +  
415 MM1S.Luc, and HDAC3 KD HS-5 + MM1S.Luc. These top genes were selected based on p-values.  
416 The z-scores of the logCPM are plotted. **(b)** Dot plots for miR380, miR382, miR15b, miR9986, and  
417 miR5191 show that these miRNAs are upregulated in exosomes derived from HS-5 (control) +  
418 MM1S.Luc when compared to MM1S.Luc alone and/or HS-5 (HDAC3 KD) + MM1S.Luc.
